1 Clarifying intercellular signalling in yeast: *Saccharomyces cerevisiae* does not  
2 undergo a quorum sensing-dependent switch to filamentous growth

3 Michela Winters<sup>a</sup>, Violetta Aru<sup>b</sup>, Kate Howell<sup>a,#</sup>, and Nils Arneborg<sup>b</sup>

4 <sup>a</sup> School of Agriculture and Food, Faculty of Veterinary and Agricultural Science,  
5 University of Melbourne, Parkville 3010, Australia

6 <sup>b</sup> Department of Food Science, University of Copenhagen, Frederiksberg 1958,  
7 Denmark

8

9 Running Head (max 54 characters & spaces): Unipolar budding of *Saccharomyces*  
10 *cerevisiae*

11

12 #Address correspondence to Kate Howell, [khowell@unimelb.edu.au](mailto:khowell@unimelb.edu.au)

13

14 Abstract word count: 249 (max 250)

15 Importance: 150 (max 150 words)

16 Text Word Count: 5028 (5000 approx limit)

17

## 18 **ABSTRACT (250 WORDS)**

19 *Saccharomyces cerevisiae* can alter its morphology to a filamentous form  
20 associated with unipolar budding in response to environmental stressors. Induction of  
21 filamentous growth is suggested under nitrogen deficiency in response to alcoholic  
22 signalling molecules through a quorum sensing mechanism. To investigate this claim,  
23 we analysed the budding pattern of *S. cerevisiae* cells over time under low nitrogen  
24 while concurrently measuring cell density and extracellular metabolite concentration. We  
25 found that the proportion of cells displaying unipolar budding increased between local  
26 cell densities of  $4.8 \times 10^6$  and  $5.3 \times 10^7$  cells/ml within 10 to 20 hours of growth. However,  
27 the observed increase in unipolar budding could not be reproduced when cells were  
28 prepared at the critical cell density and in conditioned media. Removing the nutrient  
29 restriction by growth in high nitrogen conditions also resulted in an increase in unipolar  
30 budding between local cell densities of  $5.2 \times 10^6$  and  $8.2 \times 10^7$  cells/ml within 10 to 20  
31 hours of growth, but there were differences in metabolite concentration compared to the  
32 low nitrogen conditions. This suggests that neither cell density, metabolite  
33 concentration, nor nitrogen deficiency were necessary or sufficient to increase the  
34 proportion of unipolar budding cells. It is therefore unlikely that quorum sensing is the  
35 mechanism controlling the switch to filamentous growth in *S. cerevisiae*. Only a high  
36 concentration of the putative signalling molecule, 2-phenylethanol resulted in an  
37 increase in unipolar budding, but this concentration was not physiologically relevant. We  
38 suggest that the compound 2-phenylethanol acts through a toxicity mechanism, rather  
39 than quorum sensing, to induce filamentous growth.

## 40 **IMPORTANCE (150 WORDS)**

41           Investigating dimorphism in the model organism *Saccharomyces cerevisiae* has  
42 been instrumental in understanding the signalling pathways that control hyphal growth  
43 and virulence in human pathogenic fungi. Quorum sensing was proposed to signal  
44 morphogenesis in *S. cerevisiae* populations. This mechanism requires the switch to  
45 filamentous growth to occur at a critical quorum sensing molecule concentration  
46 corresponding to a critical cell density. However, the evidence for this mechanism is  
47 sparse and limited by the use non-physiologically relevant concentrations of signalling  
48 metabolites. Our study designed a methodology to address this gap and may be applied  
49 to further studies of dimorphism in other types of yeasts. A significant implication of our  
50 findings is that morphogenesis does not occur in *S. cerevisiae* via a quorum sensing  
51 mechanism, and this important definition needs to be corrected. Mechanistic studies to  
52 understand dimorphism in yeasts, by considering metabolite concentrations, will further  
53 shed light onto this important cellular behaviour.

## 54 **KEYWORDS**

55           *Saccharomyces cerevisiae*, filamentous growth, budding pattern, signalling  
56 metabolites, cell density

## 57 **INTRODUCTION**

58           The yeast *Saccharomyces cerevisiae* has the ability to exist in different  
59 multicellular forms depending on its environment. In liquid environments, the yeast cells  
60 can be sessile or planktonic and may form flocs and flours, and in solid and semi-solid  
61 substrates, colonies, biofilms, filaments and mats are observed. Filamentous growth of

62 *S. cerevisiae* commonly occurs under nutrient starvation and has been hypothesised as  
63 a mechanism to allow the cells to grow into their immediate environment and forage for  
64 available nutrients (1, 2). This morphogenesis is described as pseudohyphal or invasive  
65 depending on whether the cells exist as diploids or haploids and can be observed both  
66 at a colony and cellular level. When growing on agar plates, colony morphology and  
67 invasion reveal filamentous growth, and these macro-observations are determined by  
68 budding pattern and cell shape that indicate filamentous growth at the cellular level.

69 Budding is the method by which *S. cerevisiae* cells divide during their mitotic cell  
70 cycle. The budding pattern is determined by the orientation of new buds with respect to  
71 the mother-daughter junction and can be differentiated as axial, bipolar or unipolar (Fig.  
72 1A). Whether the cell is a diploid or haploid will determine which budding pattern is  
73 exhibited when cells grow planktonically (3, 4). Haploid cells bud in an axial manner  
74 whereby the new bud consistently emerges adjacent to or overlapping the pole of the  
75 previous mother-daughter junction. Diploid cells, however, bud according to a bipolar  
76 pattern, where buds can emerge either adjacent to the mother-daughter junction or at  
77 the opposite pole. Usually, the first bud site of a new daughter cell has a strong opposite  
78 pole bias, while second and subsequent buds have no bias towards a pole (1, 3, 5, 6).  
79 Both haploids and diploids transition to a unipolar budding pattern when cells switch to  
80 filamentous growth. This pattern occurs when the daughter buds consistently from the  
81 pole opposite the junction to its mother (1, 7-11). Cell division is thus polarized by the  
82 serial reiteration of unipolar budding away from the mass of cells in the colony into  
83 chains of interconnected cells (1).

84 *S. cerevisiae* cells undergoing filamentous growth have a higher proportion of  
85 unipolar budding compared to non-filamentous cells. Previous research established that  
86 when two bud sites are observed, non-filamentous cells show 70-71% unipolar budding,  
87 while filamentous cells show 90-100% unipolar budding (1, 7). For cells with three bud  
88 sites, this proportion of unipolar budding was observed to be 26% for non-filamentous  
89 cells and 97% for filamentous cells (7). Furthermore, under filamentous growth inducing  
90 conditions (nitrogen deficiency), unipolar budding was found to increase by an average  
91 of 35% (12). Observation of a higher proportion of unipolar budding cells thus signifies  
92 that cells are on track to grow as filaments.

93 Filamentous growth is induced in *S. cerevisiae* cells in response to different  
94 environmental cues and stressors, including nutrient deficiency and signalling  
95 molecules. Filamentous cells are considered more able to scavenge nutrients when  
96 exposed to a variety of extracellular stressors (13). Nutrient starvation, including lack of  
97 nitrogen (1, 11, 14-16), glucose (8, 17), carbon (16) and amino acids (18), can trigger  
98 the morphological change to filamentous growth. An additional adaptation to nitrogen  
99 starvation is the secretion of autoregulatory aromatic alcohols that stimulate filamentous  
100 growth through a quorum sensing mechanism (14, 19-21).

101 Quorum sensing is a form of intercellular signalling where interactions between  
102 organisms are mediated by intercellular signalling molecules (22). Quorum sensing  
103 involves a cell-density dependent regulation of a behaviour that occurs after a critical  
104 signal concentration of quorum sensing molecules is achieved (23). Quorum sensing  
105 molecules are excreted and accumulate in the extracellular environment proportional to  
106 cell density. At the critical cell density a corresponding threshold concentration of

107 quorum sensing molecules is reached and a synchronised response is triggered in the  
108 community of cells (24-29). H. Chen and G. R. Fink (14) observed a quorum sensing-  
109 controlled mechanism for the switch to filamentous growth in *S. cerevisiae*, connecting  
110 nutrient sensing with aromatic alcohol secretion. Nitrogen and cell density were  
111 demonstrated to regulate the production of three auto-induced aromatic alcohols via a  
112 positive feedback loop. These included tyrosol (produced in the range 1-8  $\mu\text{M}$ ), 2-  
113 phenylethanol (in the range of 1-8  $\mu\text{M}$ ) and tryptophol (in the range of 1-2  $\mu\text{M}$ ). 2-  
114 phenylethanol and tryptophol, but not tyrosol, were then found to stimulate filamentous  
115 growth when added exogenously at  $\geq 20 \mu\text{M}$  under nitrogen limiting conditions. Further  
116 studies have linked exogenous addition of different alcohols to induction of  
117 morphogenesis under both high (30) and low nitrogen (11) conditions. These include 1-  
118 butanol (11), isoamylol (11, 30), 1-propanol (11, 30) and n-hexanol (30). However, all  
119 these studies induced morphogenesis by using exogenous alcohol concentrations much  
120 higher than those found to be produced when the cell is growing in defined or undefined  
121 media (23).

122 Intercellular signalling interactions need to be defined by specific criteria to be  
123 accurately identified and understood. Previous definitions of quorum sensing have  
124 tended to be very broad so that any morphological behaviours in yeast may have been  
125 inaccurately categorised as being a result of quorum sensing. In our previous work, M.  
126 Winters et al. (23) set out a series of criteria for what constitutes an intercellular  
127 signalling molecule and quorum sensing molecule to promote clarity in classifying  
128 microbial interactions. When these defined criteria were applied to studies of quorum  
129 sensing-controlled filamentous growth in *S. cerevisiae* we found that two criteria were

130 consistently not met in prior research (23). Firstly, there is a lack of evidence that the  
131 switch in cellular behaviour occurs at a critical quorum sensing molecule concentration  
132 corresponding to a critical cell density. Secondly, all studies analysed did not use  
133 physiologically relevant concentrations of intercellular signalling molecules to trigger the  
134 switch to filamentous growth.

135         In the current study, we aimed to address these two missing criteria on the role of  
136 quorum sensing in the switch to filamentous growth in *S. cerevisiae*. We designed a  
137 new methodology which uses budding pattern as a proxy for filamentous growth. This  
138 involved observing an individual cell, growing over time, to determine the orientation of  
139 buds from new daughter cells. By using an oCelloScope<sup>TM</sup> to capture time-lapse images  
140 of budding yeast growing in liquid media, we observed a switch to a filamentous  
141 budding pattern. Since our method simultaneously quantified the budding pattern, cell  
142 density and metabolite concentration under physiological conditions, we successfully  
143 identified the critical cell density and metabolite concentration at which cells switched to  
144 filamentous growth. An untargeted metabolome approach through proton (<sup>1</sup>H) NMR  
145 meant both previously reported and putative quorum sensing molecules could be  
146 monitored. Next, we individually assessed the role of cell density, metabolites, and  
147 nitrogen concentration in triggering this switch to filamentous growth. Additionally, we  
148 investigated the role of exogenous addition of 2-phenylethanol, a putative quorum  
149 sensing molecule, in morphogenesis and found it only induced a change in morphology  
150 at high non-physiological concentrations. Together, our findings suggest that *S.*  
151 *cerevisiae* does not undergo a quorum sensing-dependent switch to filamentous growth,  
152 and that 2-phenylethanol acts through a toxicity mechanism rather than as a quorum

153 sensing molecule. Finally, the novel methodology developed here opens the way for  
154 further studies of dimorphism in other strains and species of yeasts.

## 155 **RESULTS**

### 156 ***S. cerevisiae* $\Sigma$ 1278b displays a switch in budding pattern under low nitrogen.**

157 We designed a time series experiment such that *S. cerevisiae* strains could grow  
158 in the same media continuously to obtain an accurate link between our three factors of  
159 interest: budding pattern, cell density and metabolite concentration. The cropped  
160 images obtained from the oCelloScope<sup>TM</sup> were analyzed manually and the bud site  
161 sequence of new daughters were recorded followed by a classification of their  
162 corresponding budding pattern (Fig. 1A). A representative example of this assignment  
163 process can be seen in Figure 1B.

164 The growth of *S. cerevisiae* strains S288c and  $\Sigma$ 1278b were observed under low  
165 nitrogen conditions over 30 hours (Fig. 2). The cells grew logarithmically throughout the  
166 duration of the experiment such that they were only followed in their exponential growth  
167 phase (Fig. 2A). At 30 hours, S288c continues to grow exponentially, while the  $\Sigma$ 1278b  
168 strain growth rate begins to decline after 20 hours. This decline is likely related to the  
169 nitrogen starvation that occurred toward the end of the experiment (Table S1).

170 A predominantly axial budding pattern was observed for the negative control  
171 strain S288c for both the two and three bud sites, with no significant changes in budding  
172 pattern observed over time (Fig. 2 B). Strain  $\Sigma$ 1278b budded in a predominantly bipolar  
173 or unipolar pattern. Additionally, the proportion of unipolar budding was observed to  
174 increase over time, with a corresponding decrease in bipolar budding, for both two and



175 three bud sites (Fig 2 D and E). An increase in the proportion of unipolar budding from  
176 72% to 91% (Fig 2D) was observed in cells with two bud sites. For cells with three bud  
177 sites, it increased from 20% to 36% (Fig 2E). Due to the growth limitation caused by  
178 nitrogen starvation between 20 and 30 hours (Table S1) the cells were only able to  
179 achieve two bud sites and therefore budding pattern data for three bud sites was not  
180 available during this period (Fig 2E). The significant ( $P < 0.05$ ) increase in filamentous  
181 unipolar budding occurred between the local cell densities of  $4.8 \times 10^6$  and  $5.3 \times 10^7$   
182 cells/ml within 10 and 20 hours of growth. These values signify the critical cell density  
183 for the switch to filamentous growth.

184 **Change in budding pattern and identified critical cell density are correlated to the**  
185 **physiological concentration of metabolites present.**

186 To correlate the change in concentration of metabolites over time to the changes  
187 in budding pattern and cell density observed, media from the time series experiments  
188 were collected, measured by  $^1\text{H}$  NMR spectroscopy, and compounds identified and  
189 quantified with SigMa (31). In total, 29 compounds were identified in the media with  
190 concentrations quantified for each time period (Table 1).

191 The metabolite concentrations that corresponded to the observed switch in  
192 budding pattern were 1-propanol (1.4 – 3.7  $\mu\text{M}$ ), 2-hydroxyisovalerate (0.7 – 1.3  $\mu\text{M}$ ), 2-  
193 oxoglutarate (4.4 – 9.3  $\mu\text{M}$ ), 2-phenylethanol (0.7 – 1.5  $\mu\text{M}$ ), acetaldehyde (2.3 – 19.2  
194  $\mu\text{M}$ ), acetate (17 - 160  $\mu\text{M}$ ), acetoin (6.7 – 8.0  $\mu\text{M}$ ), fumarate (0.5 – 1.1  $\mu\text{M}$ ), isoamylol  
195 (0.6 – 1.0  $\mu\text{M}$ ), isopropanol (0.4 – 2.1  $\mu\text{M}$ ), malate (2.9 – 6.8  $\mu\text{M}$ ), pyruvate (5.0 – 30.6  
196  $\mu\text{M}$ ), succinate (2.5 – 12.0  $\mu\text{M}$ ), and tyrosol (0.3 – 0.8  $\mu\text{M}$ ). These values represent the

197 physiological metabolite concentration present at the critical cell density at which cells  
198 switch to filamentous growth.

199 **Critical cell density does not recapitulate the switch in budding pattern.**

200 To establish whether the increase in unipolar budding was dependent on cell  
201 density alone, we inoculated cells at the critical cell density, recorded at 10 hours, into  
202 low nitrogen media (Fig. 3). This cell density was chosen as it was at the beginning of  
203 the time period where we observed the significant increase in unipolar budding. At the  
204 critical cell density, 71% of cells with two bud sites had a unipolar pattern (Fig. 3A). This  
205 was analogous to 72% unipolar budding observed between 0 to 10 hours in the time  
206 series experiment (Fig. 2D). This parallel was also seen for cells with three bud sites at  
207 the critical cell density where we measured 23% unipolar budding (Fig. 3B) compared to  
208 20% between 0 to 10 hours in the time series results (Fig. 2E). Since the critical cell  
209 density did not replicate the increase in unipolar budding, these findings demonstrate  
210 that cell density alone is not responsible for the behaviour.

211 **Conditioned media and cells at the critical cell density do not recapitulate the**  
212 **switch in budding pattern.**

213 To test whether the combination of physiological metabolites and the critical cell  
214 density was a trigger for the increase in unipolar budding, we determined the budding  
215 pattern of cells growing in conditioned media from 20 hours of growth at the critical cell  
216 density in low nitrogen media (Fig. 3). Growth of cells with two bud sites in conditioned  
217 media had 71% unipolar budding (Fig. 3A) and cells with three bud sites had 18% (Fig.  
218 3B). The proportion of unipolar budding observed between the critical cell density and  
219 conditioned media conditions were not significantly different; both had 71% for two bud

220 sites (Fig. 3A), and 20% and 18% respectively for three bud sites (Fig. 3B). In both  
221 cases the values paralleled the proportion of unipolar budding observed between 0 to  
222 10 hours in the time series experiment; 72% for two bud sites (Fig. 2D) and 20% for  
223 three bud sites (Fig. 2E). Thus, the combination of critical cell density and physiological  
224 metabolite concentrations were also not accountable for the observed increase in  
225 unipolar budding.

226 **High nitrogen replicated the switch budding pattern but with different produced**  
227 **metabolite concentrations.**

228 To determine whether budding pattern behaviour over time was impacted by  
229 nitrogen conditions, we carried out the time series experiment in high nitrogen media.

230 Similar to growth in low nitrogen, S288c and  $\Sigma$ 1278b cells grew logarithmically  
231 throughout the duration of the experiment such that they were only followed in their  
232 exponential growth phase (Fig. 4A). However, there was a less pronounced decrease in  
233 growth rate for the  $\Sigma$ 1278b compared to the S288c under high nitrogen conditions  
234 compared to low nitrogen conditions. This can be explained by the absence of nitrogen  
235 starvation under high nitrogen (Table S1).

236 Budding pattern behaviour was not significantly different between the two  
237 nitrogen conditions. Just as in low nitrogen, S288c showed a predominantly axial  
238 budding pattern with no changes over time (Fig. 4B and C) and  $\Sigma$ 1278b showed a  
239 consistently bipolar or unipolar budding pattern (Fig. 4D and E). Again, we saw a  
240 significant increase to a unipolar budding pattern accompanied by a significant decrease  
241 in bipolar budding between 10 and 20 hours for cells with both two and three bud sites  
242 (Fig. 4D and E). For cells with two bud sites we saw an increase in unipolar budding

243 from 67% to 84% (Fig. 4D). For cells with three bud sites, it increased from 23% to 43%  
244 (Fig. 4E). The increase in unipolar budding was associated with local cell densities of  
245  $5.2 \times 10^6$  and  $8.2 \times 10^7$  cells/ml, respectively, which signifies the critical cell density under  
246 high nitrogen. These values are of the same order of magnitude as the low nitrogen  
247 critical cell density ( $4.8 \times 10^6$  and  $5.3 \times 10^7$  cells/ml). Between 20 and 30 hours in high  
248 nitrogen we were not able to observe many cells with three bud sites (Fig. 4E) due to  
249 the cell density becoming so high that single buds were no longer visible in the images.  
250 For this reason, we did not see a statistically significant increase in the budding pattern  
251 between 0 to 10 hours and 20 to 30 hours.

252 Media from the time series experiment in high nitrogen was also analysed by  $^1\text{H}$   
253 NMR to obtain compound concentrations over time. A list of compounds identified in our  
254 high nitrogen samples and their concentrations can be seen in Table 2. Here the  
255 metabolite concentrations which corresponded to the observed switch in budding  
256 pattern were 1-propanol (1.4 – 3.4  $\mu\text{M}$ ), 2-hydroxyisovalerate (0.4 – 0.5  $\mu\text{M}$ ), 2-  
257 oxoglutarate (1.5 – 2.0  $\mu\text{M}$ ), 2-phenylethanol (0.4 – 0.6  $\mu\text{M}$ ), acetaldehyde (2.0 – 18.0  
258  $\mu\text{M}$ ), acetate (27 - 186  $\mu\text{M}$ ), acetoin (1.0 – 5.6  $\mu\text{M}$ ), fumarate (0.3 – 0.4  $\mu\text{M}$ ), isoamylol  
259 (0.7 – 0.9  $\mu\text{M}$ ), isopropanol (0.3 – 2.9  $\mu\text{M}$ ), malate (2.1- 2.2  $\mu\text{M}$ ), pyruvate (11.5 – 38.8  
260  $\mu\text{M}$ ), succinate (0.9 – 1.6  $\mu\text{M}$ ), and tyrosol (0.3 – 0.6  $\mu\text{M}$ ).

261 Comparing these values to the concentration of metabolites produced under low  
262 nitrogen at 20 hours of growth, the alcohols 2-phenylethanol and tyrosol were 60% and  
263 63% lower under higher nitrogen respectively, while 1-propanol, isoamylol, and  
264 isopropanol concentrations were equivalent. The concentrations of some acids were  
265 also lower under high nitrogen, this included the acids 2-hydroxyisovalerate ( $\downarrow 62\%$ ), 2-

266 oxoglutarate ( $\downarrow$ 79%), fumarate ( $\downarrow$ 73%), malate ( $\downarrow$ 68%) and succinate ( $\downarrow$ 87%). However,  
267 acetate and pyruvate were 16% and 27% higher in the high nitrogen, respectively. Thus,  
268 while the same budding pattern behaviour was observed in the different nitrogen  
269 conditions, there were significant differences in the metabolome. Collectively, these high  
270 nitrogen findings concur with the conditioned media results that physiological  
271 metabolites are not responsible for the observed increase in unipolar budding.

272 **Proposed signalling molecule, 2-phenylethanol, can induce unipolar budding at**  
273 **high concentrations.**

274 Exogenous 2-phenylethanol has been reported to induce cellular signalling in *S.*  
275 *cerevisiae* (14, 19), but at much higher concentrations than those observed in growth  
276 media. In order to investigate the effects of these non-physiological concentrations, we  
277 added a high concentration of 2-phenylethanol used in previous studies to stimulate  
278 filamentous growth (14) to low nitrogen media. Here we observed 91% unipolar budding  
279 for two bud sites (Fig. 3A) and 43% for three bud sites (Fig. 3B). These proportions of  
280 unipolar budding corresponded to the higher percentage of observed in both time series  
281 experiment between 10 to 20 hours; 84-91% for two bud sites (Fig. 2D and 4D) and 37-  
282 43% for three bud sites (Fig. 2E and 4E). Furthermore, the proportion of unipolar  
283 budding observed for the high 2-phenylethanol condition was significantly higher than  
284 the values observed in both the critical cell density and conditioned media conditions;  
285 71% for two bud sites (Fig. 3A) and 18-23% for three bud sites (Fig. 3B). These results  
286 indicate that a high non-physiological concentration of 2-phenylethanol can recapitulate  
287 the increase in unipolar budding, while physiological concentrations do not.

## 288 **DISCUSSION**

289           The transition to filamentous growth has been proposed as a cell density  
290 dependent, chemically mediated switch in *S. cerevisiae*. This conclusion was drawn  
291 from studies which examined the growth of yeasts, metabolites, and exogenous  
292 compounds, but work has not conclusively shown the dependency of cellular density,  
293 induction, and accumulation of a chemical signal (23).

294           The objective of this study was to address the research gaps in the transition to  
295 filamentous growth in *S. cerevisiae*. Specifically, we focused on the switch to  
296 filamentous growth at a critical quorum sensing molecule concentration corresponding  
297 to a critical cell density, and that the intercellular signalling molecule concentrations  
298 used to induce the response were physiologically relevant (23). To achieve this, we  
299 designed a new methodology to correlate the filamentous growth of *S. cerevisiae* to  
300 both cell density and metabolite concentration. We combined chemical cell  
301 immobilisation in liquid media, automated time-lapse scanning microscopy, cell counting  
302 and <sup>1</sup>H NMR. Filamentous yeast cells show a significantly higher proportion of unipolar  
303 budding overall compared to non-filamentous cells (1, 7). Thus, by using changes in  
304 budding pattern as a proxy for filamentous growth, this study was able to identify the  
305 critical cell density at which the cells switched morphology and correlate this to the  
306 physiological concentrations of metabolites present.

307           The use of the oCelloScope<sup>TM</sup> for imaging enabled us to clearly observe the  
308 budding pattern of single yeast cells over time. Previous work has applied this imaging  
309 technique to bacteriological studies on real-time detection of bacterial growth and  
310 antimicrobial susceptibility (32), and to quantify filamentous bacteria (33). The

311 methodology of monitoring yeast budding patterns presented in this paper is unique  
312 since previous studies have used photomicrographs of developing pseudohyphae in  
313 colonies growing on agar (1) or calcofluor staining of bud scars (3, 7). However, growth  
314 on agar plates does not allow the monitoring of metabolite production, budding pattern,  
315 and cell density simultaneously over time (1, 11, 14), and calcofluor staining does not  
316 permit reliable assignment of the birth end of cells (7, 17).

317         The highest proportion of unipolar budding measured here for cells with two bud  
318 sites was 85-91% (Fig. 2D and 4D). This finding is in accordance with previous studies  
319 that observed >85% unipolar buds for filamentous cells (1, 7). Conversely, in cells with  
320 three bud sites we found a maximum of 36-43% unipolar budding (Fig. 2E and 4E).  
321 Even though we saw a significant increase over time, this proportion was relatively low  
322 compared to the expected 97% from previous findings (7). A possible explanation for  
323 this might be that prior studies have not always reported on the position of third bud  
324 sites (1) and/or have tended to concentrate on cells at the periphery of the colony (1, 7).  
325 Our experiment analysed the whole population of cells which could explain this lower  
326 proportion. Additionally, our cells were in the exponential phase of growth and growing  
327 in liquid culture, while previous studies used cells in the stationary phase (14) or  
328 investigated the budding pattern of colonies growing on agar (1, 7).

329         *S. cerevisiae* strain S288c has a mutation in a gene required for filamentous  
330 growth (FLO8)(34) and therefore acted as our negative control for filamentation.  
331 Additionally, it is a haploid and thus expected to bud in a consistently axial manner (3,  
332 4). Our findings are consistent with this since we observed S288c to bud axially at all  
333 time points under both high and low nitrogen conditions. Additionally, as anticipated for

334 a diploid able to display filamentous growth, we observed strain  $\Sigma 1278b$  to bud only in a  
335 bipolar or unipolar way. Furthermore,  $\Sigma 1278b$  was observed to increase in unipolar  
336 budding, which suggests a transition to filamentous growth (1, 3-6). Our study is the first  
337 to identify the cell density at which the cells switch to a filamentous budding pattern. We  
338 define this cell density as the critical cell density, and when converted to local cell  
339 densities, we find it to be in the range of  $4.8 \times 10^6$  and  $5.3 \times 10^7$  cells/ml for low nitrogen.  
340 Local cell densities are a more accurate representation of the cell density experienced  
341 by the cells in our experiments, as all were immobilised to the bottom of the wells.

342 We sought to obtain the physiological metabolite concentrations when the cells  
343 switch to filamentous growth. For our growth phases, these were the metabolite  
344 concentrations present between 10 and 20 hours of incubation. We were able to  
345 correlate this physiological concentration of metabolites present with the critical cell  
346 density and identified a total of 29 compounds in our media (Table 1). This is  
347 comparable to other metabolome yeast studies using  $^1\text{H}$  NMR which identified 18-39  
348 total compounds (35-39). The actual number of metabolites produced by *S. cerevisiae* is  
349 likely to be in the range of 600-1000 (40, 41). Our observed metabolome may be  
350 somewhat limited by the sensitivity of NMR spectroscopy. It should be noted, however,  
351 that the highest number of identified compounds achieved using currently available  
352 techniques, such as GC-TOF-MS, ranges from 80 (42) to 110 (43), so much more  
353 research needs to be done before having any overview of the full yeast metabolome  
354 and the physiological concentrations present when cells switch to filamentous growth.

355 Experiments to probe the mechanisms of the observed change in budding  
356 pattern were carried out with the  $\Sigma 1278b$  strain under low nitrogen conditions. These



357 conditions were chosen for comparison with previous studies that have used nitrogen  
358 deficiency to induce filamentous growth (1, 11, 14). Here, to investigate the effects of  
359 cell density and metabolites independently, an overnight culture growing in YPD broth  
360 was directly diluted to an inoculation concentration that corresponded to the critical cell  
361 density (Fig. 6A). In contrast to the time series experiment (Fig. 5A), there was no  
362 previous cell growth and metabolization for 10 hours in the media. Collectively, results  
363 from these experiments suggested that neither the critical cell density alone, nor a  
364 combination of critical cell density and physiological metabolites, could recapitulate the  
365 increase in unipolar budding pattern (Fig. 3A and B). The difference in the growth  
366 environment and metabolism between the different experiments could explain why we  
367 saw no change in budding pattern in either of these conditions. The observed change in  
368 budding pattern is therefore linked to the specific growth environment found in the time  
369 series experiment.

370         Some small molecule alcohols have been associated with induction of  
371 filamentous growth through a quorum sensing mechanism whereby their production is  
372 autoinduced under low nitrogen. The identified alcohols are tyrosol, 2-phenylethanol and  
373 tryptophol (14, 19-21). We were unable to demonstrate a correlation between these  
374 alcohols and the change in budding pattern. Both tyrosol and 2-phenylethanol did not  
375 show a significant increase in concentration until 30 hours under low nitrogen and had  
376 very low concentrations prior to that (Table 1). Since the increase in unipolar budding  
377 occurred between 10 and 20 hours (Fig. 2D and E) we concluded that tyrosol and 2-  
378 phenylethanol could not induce the change in budding pattern. Furthermore, tryptophol  
379 was not identified in our samples, though we specifically looked for it during the NMR

380 metabolite identification stage. Tryptophol could have been present but at very low  
381 concentrations and non detectable to the  $^1\text{H}$  NMR. M. Avbelj et al. (21) found that  
382 tryptophol was only detectable at a conc of less than 5  $\mu\text{M}$  when cells reached approx.  
383  $1.5 \times 10^7$  cells/ml. Since our cells ended their growth at a lower cell density than this, it is  
384 likely that tryptophol was present but at a non-detectable concentration. Finally, all three  
385 alcohols have relatively low volatility (2-phenylethanol  $\text{bp}_{760} = 219^\circ\text{C}$  (44), tyrosol  $\text{bp}_{760}$   
386  $= 139^\circ\text{C}$  (45), and tryptophol  $\text{bp}_{760} = 416^\circ\text{C}$  (46)) thus the measured concentrations were  
387 not likely to be inaccurate due to loss during the experiment. The accumulated evidence  
388 in this paper indicates that these alcohols are not responsible for triggering the increase  
389 in unipolar budding. The discrepancy with previous studies may be attributed to  
390 differences in experimental design and execution. For example, our experiment was  
391 carried out in liquid media for 30 hours instead of colonies growing on agar plates for 3 -  
392 5 days (11, 14, 19).

393 Nutrient deficiencies, including nitrogen (1, 14), amino acids (18) and glucose (8,  
394 16) have commonly been linked to inducing filamentous growth in *S. cerevisiae*.  
395 Contrary to expectations, in both nitrogen rich and deficient conditions we saw a  
396 significant increase in unipolar budding between 10 to 20 hours of growth (Fig. 2B-E,  
397 3B-E) occurring at local cell densities of a similar order of magnitude (between  $5.2 \times 10^6$   
398 and  $8.2 \times 10^7$  cells/ml for high nitrogen and  $4.8 \times 10^6$  and  $5.3 \times 10^7$  cells/ml for low nitrogen).  
399 Therefore, nutrient deficiency alone appears not to trigger the switch to unipolar budding  
400 and perhaps the switch relies on other factors. Furthermore, we see that the metabolite  
401 concentrations between the two nitrogen conditions are significantly different (Table 1

402 and 2). This provides extra support to our conclusion that the measured metabolites are  
403 not triggering the increase in unipolar budding.

404         The results presented in this study have important implications in terms of  
405 satisfying the necessary criteria to be classified as a quorum sensing mechanism.  
406 Specifically the criteria that filamentous growth is triggered at a critical cell density and is  
407 reproducible at physiological signal molecule concentrations (23). Therefore, our  
408 findings that the critical cell density and physiological metabolite concentration are not  
409 responsible for the shift to a filamentous budding pattern leads to the conclusion that  
410 this phenomenon is not occurring through a quorum sensing mechanism but is being  
411 controlled in an alternative way. While the change in budding pattern observed in the  
412 time series experiment appears to be cell density dependent, it does not however align  
413 with an authentic quorum sensing mechanism based on the previously defined criteria.  
414 It is only when the cells could increase in cell density in the same media over time that  
415 this shift to unipolar budding was observed. These findings raise intriguing questions  
416 regarding the mechanism of action controlling this transition to filamentous growth and  
417 highlight the need for further studies into this important issue.

418         An alternative mechanism could be one involving cell-to-cell-contact that was  
419 found to be a mechanism of growth arrest in yeast (47, 48). Cellular communication  
420 mediated by direct cell-to-cell contact has also been found in bacteria. For example,  
421 direct cell-to-cell contact results in growth inhibition in *Escherichia coli* (49), coordinates  
422 cellular motility in *Mycobacterium* (50), and mediates auto aggregation and  
423 adhesiveness in *Lactobacillus acidophilus* cell surface (51). Thus, there may be a signal  
424 present on the cell surface, only present there because of metabolism, that signals the

425 change in budding pattern. Further investigation is therefore required to determine the  
426 mechanism by which the cells increase in unipolar budding since there appears to be  
427 more transpiring than a quorum sensing mechanism.

428 As mentioned above, 2-phenylethanol has previously been linked to inducing  
429 filamentous growth under low nitrogen conditions (14, 19). In these previous  
430 experiments, the compound was added at concentrations much higher than those  
431 produced by the cells growing in defined media (14, 19, 20). When we used a high non-  
432 physiological concentration of 2-phenylethanol, 20  $\mu\text{M}$  compared to the maximum of 4.3  
433  $\mu\text{M}$  measured in our low nitrogen media, we observed a shift to unipolar budding. Thus,  
434 a high concentration of 2-phenylethanol induced an increase in unipolar budding  
435 whereas physiological levels of both 2-phenylethanol and other metabolites did not in  
436 our experiments. This finding confirms the association between 2-phenylethanol and  
437 filamentous growth. However, an implication of the non-physiological concentration  
438 used is that 2-phenylethanol-induced filamentous growth cannot be occurring through a  
439 quorum sensing mechanism as previously suggested (14, 21). Table 3 directly  
440 compares our 2-phenylethanol findings with the criteria defined by M. Winters et al. (23)  
441 and finds it does not satisfy two key points. Therefore, we hypothesise that 2-  
442 phenylethanol induces filamentous growth through a toxicity mechanism due to its high  
443 concentration rather than through an intercellular signalling mechanism.

444 A recent study by B. A. Lenhart et al. (52) also provides evidence contrary to  
445 previous assumptions of quorum sensing mechanisms in *S. cerevisiae*. They found that  
446 the induction of morphogenesis by high concentrations of 2-phenylethanol and  
447 tryptophol (100  $\mu\text{M}$ ) is not observed in most environmental isolates and that the

448 filamentous induction response in  $\Sigma 1278b$  was small compared to the extent of that  
449 reported by H. Chen and G. R. Fink (14). This supports our conclusion that quorum  
450 sensing controlled filamentous growth in yeast is not straightforward and that the  
451 mechanism of this biologically critical phenomenon requires more examination.

452         The contribution of this study has been to provide clarity of this transition in the  
453 model and industrially useful species, *S. cerevisiae*, highlighting the need for further  
454 investigation to determine the mechanism controlling the shift to filamentous growth  
455 under physiological conditions. It thus challenges the assumptions around quorum  
456 sensing in *S. cerevisiae* widely accepted in literature. The mechanism by which the  
457 switch to filamentous growth occurs in *S. cerevisiae* needs to be elucidated through  
458 further research without resorting to categorisation into quorum sensing mechanisms.  
459 Furthermore, this paper supplies a new methodology of investigating filamentous growth  
460 by using budding pattern as a proxy. This may be used to further develop understanding  
461 in studies of dimorphism and signalling in other important yeast strains and species.

## 462 **MATERIALS AND METHODS**

### 463 **Yeast Strains & Media.**

464         The *Saccharomyces cerevisiae* strains S288c and  $\Sigma 1278b$  were used as a  
465 negative and positive control for filamentation respectively (Fig. 5A). The strains were  
466 maintained using accepted protocols, detailed below.

467         Yeast Extract Peptone Dextrose (YPD) broth was made by combining 1 g yeast  
468 extract (BD Bacto™, Herlev, Denmark), 2 g bacteriological peptone and 2 g glucose per  
469 100 ml of distilled water. The solution was stirred with heating until dissolved. 2 % YPD

470 agar plates were made in the same way but with addition of 2g/100ml bacteriological  
471 agar to the YPD broth before autoclaving. Synthetic Low Ammonium Dextrose (SLAD)  
472 broth was made by combining 0.67 g Yeast Nitrogen Base without amino acids and  
473 ammonium sulphate (BD Difco™, Herlev, Denmark), 2 g glucose and 50 µl of  
474 ammonium sulphate solution (1M) per 100 ml of distilled water. Synthetic Ammonium  
475 Dextrose (SAD) liquid broth was made by combining 0.67 g Yeast Nitrogen Base  
476 without amino acids and ammonium sulphate, 2 g glucose and 3.7 ml of ammonium  
477 sulphate solution (1M) per 100 ml of distilled water. All media was autoclaved and  
478 cooled to room temperature and sterile filtered (Q-Max 25 mm 0.22 µm CA) before use.  
479 Concanavalin A (biotin conjugate, Type IV) at 1mg/ml MilliQ water (Con A) was used for  
480 chemical immobilization of cells. All chemicals were purchased from Sigma–Aldrich  
481 (Søborg, Denmark).

#### 482 **Image Acquisition.**

483 Images of growing cells in liquid media were obtained using an oCelloScope™  
484 (BioSense Solutions ApS, Farum, Denmark). The oCelloScope™ is a digital time-lapse  
485 microscopy technology that generates very clear images of growing microorganisms.  
486 This is achieved by scanning through a sample to produce a series of images using a  
487 tilted imaging plane. Combining the tilted images give the best focus images and a time-  
488 lapse of single cells over time (32, 33).

#### 489 **Time series investigation of budding pattern under low & high nitrogen** 490 **conditions.**

491 S288c and Σ1278b strains of *S. cerevisiae* (Fig. 5A) were used in the time series  
492 experiment which linked budding pattern with cell density and physiological metabolite

493 concentrations. Figure 5B represents a schematic of the overall time series  
494 experimental process used in this research. The experiment was carried out in both high  
495 (SAD) and low nitrogen (SLAD) liquid media with the same starting cell density of  $10^3$   
496 cells/ml (Fig. 5C). The overnight culture was made by inoculating 5 ml of YPD broth in a  
497 15 ml centrifuge tube with a single yeast colony grown on a 2% YPD agar plate. This  
498 was incubated overnight at 25°C with shaking. After overnight incubation, the cells were  
499 counted using a hemocytometer (Neubauer Improved counting chamber, Assistent),  
500 washed twice with the relevant media, and diluted to obtain a cell density of  $1 \times 10^3$   
501 cells/ml in the relevant media. Three 5 ml stock cultures were made in 15 ml centrifuge  
502 tubes with lids to produce biological replicates A, B and C for each condition (Fig. 5C).  
503 During the experiment these stock cultures grew at 25°C without shaking. Wells of the  
504 12-well microtiter plate (VWR 734-2324 T C-treated 12-well plates) were prepared just  
505 before inoculation and imaging by coating the bottom of each well with 15  $\mu$ l of Con A  
506 and allowing the wells to dry. 1 ml of each stock culture was pipetted into wells of the  
507 microtiter plate. After inoculation with the cell suspension the plate was placed in the  
508 oCelloScope<sup>TM</sup> and allowed to rest for 30 minutes<sup>TM</sup> before starting image acquisition.  
509 This was to ensure that the cells were all immobilized on the bottom of the well before  
510 imaging to aid focusing. Scanning was set to take place every 10 minutes for 10 hours  
511 with one scan area per well at 25°C. Two scan areas per well was used for final 20-to-  
512 30-hour time point due to the higher cell density. After 10 hours of image acquisition, the  
513 plate was removed, the media collected, spun down in a centrifuge and the supernatant  
514 collected and stored at -80° for <sup>1</sup>H NMR analysis. Direct transfer of 1 ml of each stock  
515 solution occurred again at 10 and 20 hours to a freshly Con A coated microtiter plate, as  
516 previously described. Images at 10 and 20 hours were acquired as previously

517 described. Thus, this process resulted in a total of 30 hours of imaging to give three  
518 image acquisitions time periods of 10 hours each. Cell density of the stock cultures was  
519 also measured at 10, 20 and 30 hours with a hemocytometer.

## 520 **Investigating the factors responsible for change in budding pattern**

521 Figure 6A represents a schematic of the overall process for the experiments used  
522 to investigate the effect of various factors of interest on the budding pattern. This  
523 included investigating the effect of critical cell density, conditioned media and high 2-  
524 phenylethanol concentrations (Fig. 6B). All experiments were carried out using a cell  
525 density which corresponded to the critical cell density identified in the low nitrogen time  
526 series experiment ( $2 \times 10^4$  cells/ml)

### 527 **Effect of critical cell density alone on budding pattern.**

528 To test the effect of cell density on the budding pattern, we analyzed the effect of  
529 using cells at the critical cell density in low nitrogen broth. The critical cell density  
530 condition used SLAD media inoculated with the critical cell density of  $2 \times 10^4$  cells/ml  
531 (Fig. 6B). 5 ml of YPD broth in a 15 ml centrifuge tube was inoculated with a single  
532 yeast colony grown on a 2% YPD agar plate and incubated overnight at 25°C with  
533 shaking. After overnight incubation, the cells were counted using a hemocytometer to  
534 obtain their cell density. These cells were then washed twice with SLAD media. A cell  
535 density of  $2 \times 10^4$  cells/ml (critical cell density) was obtained to make three 1 ml solutions  
536 (Fig. 6A). This produced three biological replicates, A, B and C. The microtiter plate was  
537 prepared as in the time series experiment. The three 1 ml solutions were pipetted into  
538 the relevant wells before analysis. Image acquisition in the oCelloScope™ and image



539 analysis to obtain the budding pattern was carried out as in the time series budding  
540 pattern assay.

541 **Investigating the combined effect of critical cell density and metabolites on**  
542 **budding pattern.**

543 To test the effect of critical cell density and metabolites on budding pattern. This  
544 was done by inoculating the critical cell density of  $2 \times 10^4$  cells/ml into conditioned media  
545 grown for 20 hours (Fig. 6B). Conditioned media was produced by growing  $10^3$  cells/ml  
546 of freshly washed cells in SLAD broth for 20 hours followed by centrifugation and  
547 supernatant removal. This conditioned media supernatant was used immediately in the  
548 experiment to wash and inoculate cells, as described in the previous section.

549 **Investigating the effect of non-physiological 2-phenylethanol on budding pattern**

550 To investigate the effect of non-physiological concentrations of 2-phenylethanol  
551 on the budding pattern we used SLAD broth containing 20  $\mu$ M of 2-phenylethanol. This  
552 concentration was previously found to induce filamentation by H. Chen and G. R. Fink  
553 (14) under low nitrogen. Cells were inoculated into the spiked broth at the critical cell  
554 density of  $2 \times 10^4$  cells/ml (Fig 3B). Cell preparation, inoculation and imaging was carried  
555 out as described in the previous section.

556 **Image analysis to obtain budding pattern.**

557 Manual image analysis was carried out on the images acquired from the  
558 oCelloScope<sup>TM</sup> to determine the budding patterns of individual cells. Firstly, the scan  
559 areas were cropped using a custom-made code in MATLAB such that thirty images  
560 were cropped from each scan area from the three biological replicate wells. Each  
561 cropped image was then analyzed by eye to determine the bud site sequence of new

562 daughter cells over each period of image acquisition to obtain a bud site sequence for  
563 >200 cells and >300 bud sites for each condition (Fig. 1A). This was done by observing  
564 new daughter cells and recording the positions of the first two or three bud sites  
565 (dependent on the number of times the cell budded within the time frame) to assign  
566 each cell with a bud site sequence. An example of this process on a representative cell  
567 can be found in Fig 1B (for full time-lapse see Movie S1). These were then assigned  
568 their corresponding budding pattern classification (axial, bipolar or unipolar) according to  
569 Figure 1A. The budding pattern assignments were then analyzed to determine the  
570 percentage value of each budding pattern for the different experimental conditions.

### 571 **Cell Density Data Analysis**

572 Cell densities were averages of three biological replicates. As mentioned above,  
573 the cell density in the 1 ml ( $V_{\text{sample}}$ ) of stock solution was determined before imaging by  
574 counting with a hemocytometer. This measured cell density value can be converted to a  
575 local cell density that the cells would experience based on being immobilized on the  
576 bottom of the well. By using the following values, the measured cell density (Measured  
577 CD) was recalculated to obtain a local density (Local CD).

578 Assuming a yeast cell size of 10  $\mu\text{m}$ , we calculated the volume that the yeasts  
579 would occupy at the bottom of the well. Since the well had a bottom surface area of 3.85  
580  $\text{cm}^2$ , the new volume occupied by the yeast at the bottom of the well would be  $3.85 \times 10^{-3}$   
581  $\text{cm}^3$  ( $V_{\text{bottom}}$ ) if the whole bottom surface was covered with yeast. This value was used to  
582 convert the cell-density per ml value to a local cell density according to the following  
583 formula:

$$Local\ CD = \frac{Measured\ CD \times V_{sample}}{V_{bottom}}$$

## 584 **NMR Chemicals & Buffer Preparation**

585 Analytical grade sodium phosphate monobasic (NaH<sub>2</sub>PO<sub>3</sub>, ≥99.0%), sodium  
586 phosphate dibasic dihydrate (Na<sub>2</sub>HPO<sub>3</sub>, 2 H<sub>2</sub>O, ≥98.0%), sodium azide (NaN<sub>3</sub>, ≥99.5%),  
587 deuterium oxide (D<sub>2</sub>O, 99.9 atom % D), and 3-trimethyl-silyl-[2,2,3,3-<sup>2</sup>H<sub>4</sub>] propionic acid  
588 sodium salt (TSP-d<sub>4</sub>, 98 atom % D) were purchased from Sigma–Aldrich (Søborg,  
589 Denmark). Water used throughout the study was purified using a Millipore lab water  
590 system (Merck KGaA, Darmstadt, Germany) equipped with a 0.22 mm filter membrane.

## 591 **NMR Sample Preparation**

592 An aliquot of 700 µL of sample was transferred into a 2 mL Eppendorf tube  
593 containing 300 µL of phosphate buffer (0.15 M, 20% D<sub>2</sub>O). The mixture was vigorously  
594 vortexed for 30 s. A volume of 600 µL was transferred into 5 mm O.D. NMR SampleJet  
595 tubes (Bruker Biospin, Ettlingen, Germany).

## 596 **NMR Measurements**

597 Proton (<sup>1</sup>H) NMR spectra were recorded on a Bruker Avance III 600 operating at  
598 a proton's Larmor frequency of 600.13 MHz. The spectrometer was equipped with a 5  
599 mm broadband inverse (BBI) probe and an automated sample changer (SampleJet™,  
600 Bruker Biospin, Ettlingen, Germany). The SampleJet was equipped with a refrigerated  
601 sample storage station with cooling racks (278 K) and heating/drying station (298 K).  
602 Data acquisition and processing were carried out in the TopSpin software (version 3.5,  
603 Bruker, Rheinstetten, Germany). Automation of the overall measurement procedure was  
604 controlled by iconNMR™ (Bruker Biospin, Rheinstetten, Germany). NMR spectra were

605 measured at 298 K using the standard pulse sequence for pre-saturation of the water  
606 signal (zgcppr pulse program, Bruker nomenclature), a 90° pulse, a sweep width of  
607 9615.385 Hz (16 ppm), and an acquisition time of 3 s. The relaxation delay (d1) was set  
608 to 4 s. The receiver gain (RG) value was determined experimentally for each sample.  
609 NMR data was collected into 32 K data points after 512 scans. Each free induction  
610 decay was apodized by a Lorentzian line-broadening of 0.3 Hz. Automatic phase and  
611 baseline correction were performed in TopSpin.

## 612 **Processing of the NMR data and metabolites quantification**

613 NMR spectra were imported into the SigMa software (31) where the <sup>1</sup>H NMR  
614 signals were referenced to the TSP signal at 0.00 ppm. Signals alignment and  
615 quantification (relative) were performed in SigMa by icoshift and multivariate curve  
616 resolution, respectively (53, 54). The yeast metabolome database (<http://www.ymdb.ca/>)  
617 and the Chenomx NMR suite (Chenomx Inc. Edmonton, Canada) were used for  
618 metabolite identification.

619 Metabolite concentrations (absolute) were calculated using the following  
620 equation:

$$621 \quad C(X) = \frac{\text{Area}(X)}{\text{Area}(\text{Ref})} * \frac{H(\text{Ref}) * C(\text{Ref})}{H(X)}$$

622 Where C(X) is the concentration of the metabolite X, Ref is the reference compound  
623 (TSP), and H indicates the number of protons giving rise to the signal from metabolite X  
624 and the reference compound (TSP).

625 Due to the short recycle delay (D1) employed for the <sup>1</sup>H NMR experiments  
626 (D1=4) - too short for an accurate absolute quantification of TSP (D1≥20) - metabolite

627 concentrations (absolute) were calculated in two-steps: firstly, the average glucose  
628 concentration in the raw media (known) was used to retrieve an estimate of the TSP  
629 concentration (absolute) in the very same samples. Secondly, the average absolute  
630 concentration of TSP was used to calculate the metabolite concentrations (absolute) in  
631 the remaining samples. Therefore, metabolites concentrations reported in the present  
632 study are to be considered as estimates of absolute concentrations.

### 633 **Statistical Analysis**

634 Statistical analyses were performed using Minitab® 19.2020.1 (64-bit). To  
635 determine statistically significant differences between conditions of budding pattern  
636 proportions, a 2x2 contingency table using Fisher's Exact Test at a significance level of  
637  $p=0.05$  was applied. For metabolite concentrations, a minimum of two biological  
638 replicates were averaged, and standard deviations calculated to determine the standard  
639 error of the mean.

## 640 **ACKNOWLEDGEMENTS**

641 This research was supported by the Faculty of Veterinary and Agricultural  
642 Science at the University of Melbourne and an Australian Government Research  
643 Training Program (RTP) Scholarship.

644 We are grateful to Nadia Devargue, Chu Chu Huang and Sebastian Bech-  
645 Terkilsen from the University of Copenhagen for assistance in the laboratory, and  
646 Franciscus Winfried J van der Berg from the University of Copenhagen for allowing us  
647 use of an oCelloScope™.

648 We declare that we have no conflict of interest.

649 Experiment designed by MW, KH and NA; experiment and analysis carried out by  
650 MW; NMR data collected by VA; paper written by MW. All authors have read, critically  
651 revised, and approved the final version of the manuscript.

## 652 REFERENCES

### 653 Notes on citations

- 654 1. Gimeno CJ, Ljungdahl PO, Styles CA, Fink GR. 1992. Unipolar cell divisions in the yeast *S.*  
655 *cerevisiae* lead to filamentous growth: Regulation by starvation and RAS. *Cell* 68:1077-1090.
- 656 2. Ceccato-Antonini SR, Sudbery PE. 2004. Filamentous growth in *Saccharomyces cerevisiae*.  
657 *Brazilian Journal of Microbiology* 35:173-181.
- 658 3. Chant J, Pringle JR. 1995. Patterns of bud-site selection in the yeast *Saccharomyces cerevisiae*.  
659 *The Journal of cell biology* 129:751-765.
- 660 4. Freifelder D. 1960. Bud position in *Saccharomyces cerevisiae*. *Journal of bacteriology* 80:567.
- 661 5. Gimeno CJ, Fink GR. 1992. The logic of cell division in the life cycle of yeast. *Science* 257:626.
- 662 6. Madden K, Costigan C, Snyder M. 1992. Cell polarity and morphogenesis in *Saccharomyces*  
663 *cerevisiae*. *Trends in Cell Biology* 2:22-29.
- 664 7. Kron SJ, Styles CA, Fink GR. 1994. Symmetric cell division in pseudohyphae of the yeast  
665 *Saccharomyces cerevisiae*. *Molecular biology of the cell* 5:1003-1022.
- 666 8. Cullen PJ, Sprague GF. 2000. Glucose depletion causes haploid invasive growth in yeast.  
667 *Proceedings of the National Academy of Sciences* 97:13619-13624.
- 668 9. Dickinson J. 2008. Filament formation in *Saccharomyces cerevisiae* — a review. *Folia*  
669 *Microbiologica* 53:3-14.
- 670 10. Lengeler KB, Davidson RC, D'souza C, Harashima T, Shen W-C, Wang P, Pan X, Waugh M,  
671 Heitman J. 2000. Signal transduction cascades regulating fungal development and virulence.  
672 *Microbiology and Molecular Biology Reviews* 64:746-785.
- 673 11. Lorenz MC, Cutler NS, Heitman J. 2000. Characterization of alcohol-induced filamentous growth  
674 in *Saccharomyces cerevisiae*. *Molecular Biology of the Cell* 11:183-199.
- 675 12. Cali BM, Doyle TC, Botstein D, Fink GR. 1998. Multiple functions for actin during filamentous  
676 growth of *Saccharomyces cerevisiae*. *Molecular Biology of the Cell* 9:1873-1889.
- 677 13. Karunanithi S, Joshi J, Chavel C, Birkaya B, Grell L, Cullen PJ. 2012. Regulation of mat responses  
678 by a differentiation MAPK pathway in *Saccharomyces cerevisiae*. *PLoS One* 7:e32294.
- 679 14. Chen H, Fink GR. 2006. Feedback control of morphogenesis in fungi by aromatic alcohols. *Genes*  
680 *& Development* 20:1150-1161.
- 681 15. Gancedo JM. 2001. Control of pseudohyphae formation in *Saccharomyces cerevisiae*. *FEMS*  
682 *microbiology reviews* 25:107-123.
- 683 16. Lambrechts MG, Bauer FF, Marmur J, Pretorius IS. 1996. Muc1, a mucin-like protein that is  
684 regulated by Mss10, is critical for pseudohyphal differentiation in yeast. *Proceedings of the*  
685 *National Academy of Sciences* 93:8419-8424.
- 686 17. Cullen PJ, Sprague Jr GF. 2002. The roles of bud-site-selection proteins during haploid invasive  
687 growth in yeast. *Molecular biology of the cell* 13:2990-3004.

- 688 18. Braus GH, Grundmann O, Bruckner S, Mosch H-U. 2003. Amino acid starvation and Gcn4p  
689 regulate adhesive growth and FLO11 gene expression in *Saccharomyces cerevisiae*. *Molecular*  
690 *biology of the cell* 14:4272-4284.
- 691 19. González B, Vázquez J, Cullen PJ, Mas A, Beltran G, Torija M-J. 2018. Aromatic Amino Acid-  
692 Derived Compounds Induce Morphological Changes and Modulate the Cell Growth of Wine  
693 Yeast Species. *Frontiers in Microbiology* 9:1-16.
- 694 20. González B, Vázquez J, Morcillo-Parra MÁ, Mas A, Torija MJ, Beltran G. 2018. The production of  
695 aromatic alcohols in non-*Saccharomyces* wine yeast is modulated by nutrient availability. *Food*  
696 *Microbiology* 74:64-74.
- 697 21. Avbelj M, Zupan J, Kranjc L, Raspor P. 2015. Quorum-Sensing Kinetics in *Saccharomyces*  
698 *cerevisiae*: A Symphony of ARO Genes and Aromatic Alcohols. *Journal of Agricultural and Food*  
699 *Chemistry* 63:8544-8550.
- 700 22. Monds RD, O'Toole GA. 2008. Metabolites as intercellular signals for regulation of community-  
701 level traits, p 105-129. *In* Winans S, Bassler B (ed), *Chemical Communication Among Bacteria*.  
702 *American Society of Microbiology, Washington, DC*.
- 703 23. Winters M, Arneborg N, Appels R, Howell K. 2019. Can community-based signalling behaviour in  
704 *Saccharomyces cerevisiae* be called quorum sensing? A critical review of the literature. *FEMS*  
705 *Yeast Research* 19.
- 706 24. Miller M, Bassler B. 2001. Quorum Sensing in Bacteria. *Annual Review of Microbiology* 55:165-  
707 199.
- 708 25. Henke JM, Bassler BL. 2004. Bacterial social engagements. *Trends in Cell Biology* 14:648-656.
- 709 26. Fuqua C, Winans SC, Greenberg EP. 1996. Census and Consensus in Bacterial Ecosystems: The  
710 LuxR-LuxI Family of Quorum-Sensing Transcriptional Regulators. *Annual Review of Microbiology*  
711 50:727-751.
- 712 27. Kleerebezem M, Quadri LEN, Kuipers OP, De Vos WM. 1997. Quorum sensing by peptide  
713 pheromones and two-component signal-transduction systems in Gram-positive bacteria.  
714 *Molecular Microbiology* 24:895-904.
- 715 28. West SA, Winzer K, Gardner A, Diggle SP. 2012. Quorum sensing and the confusion about  
716 diffusion. *Trends in Microbiology* 20:586-594.
- 717 29. Wuster A, Babu MM. 2008. Chemical Molecules that Regulate Transcription and Facilitate Cell-  
718 to-Cell Communication, p 1-8. *In* Begley TP (ed), *Wiley Encyclopedia of Chemical Biology*  
719 doi:doi:10.1002/9780470048672.webc501. John Wiley & Sons, New Jersey.
- 720 30. Dickinson J. 1996. Fusel alcohols induce hyphal-like extensions and pseudohyphal formation in  
721 yeasts. *Microbiology* 142:1391-1397.
- 722 31. Khakimov B, Mobaraki N, Trimigno A, Aru V, Engelsen SB. 2020. Signature Mapping (SigMa): An  
723 efficient approach for processing complex human urine <sup>1</sup>H NMR metabolomics data. *Analytica*  
724 *Chimica Acta*.
- 725 32. Fredborg M, Andersen KR, Jørgensen E, Droce A, Olesen T, Jensen BB, Rosenvinge FS,  
726 Sondergaard TE. 2013. Real-Time Optical Antimicrobial Susceptibility Testing. *Journal of Clinical*  
727 *Microbiology* 51:2047.
- 728 33. Fredborg M, Rosenvinge FS, Spillum E, Kroghsbo S, Wang M, Sondergaard TE. 2015. Automated  
729 image analysis for quantification of filamentous bacteria. *BMC Microbiology* 15:255.
- 730 34. Liu H, Styles CA, Fink GR. 1996. *Saccharomyces cerevisiae* S288C Has a Mutation in FLO8, a Gene  
731 Required for Filamentous Growth. *Genetics* 144:967-978.
- 732 35. Puig-Castellví F, Alfonso I, Piña B, Tauler R. 2015. A quantitative <sup>1</sup>H NMR approach for  
733 evaluating the metabolic response of *Saccharomyces cerevisiae* to mild heat stress.  
734 *Metabolomics* 11:1612-1625.

- 735 36. Nilsson M, Duarte IF, Almeida C, Delgadillo I, Goodfellow BJ, Gil AM, Morris GA. 2004. High-  
736 resolution NMR and diffusion-ordered spectroscopy of port wine. *Journal of agricultural and*  
737 *food chemistry* 52:3736-3743.
- 738 37. Peng C, Viana T, Petersen MA, Larsen FH, Arneborg N. 2018. Metabolic footprint analysis of  
739 metabolites that discriminate single and mixed yeast cultures at two key time-points during  
740 mixed culture alcoholic fermentations. *Metabolomics* 14:93.
- 741 38. Kumar Babele P. 2019. Zinc oxide nanoparticles impose metabolic toxicity by de-regulating  
742 proteome and metabolome in *Saccharomyces cerevisiae*. *Toxicology Reports* 6:64-73.
- 743 39. Lourenço AB, Roque FC, Teixeira MC, Ascenso JR, Sá-Correia I. 2013. Quantitative <sup>1</sup>H-NMR-  
744 Metabolomics Reveals Extensive Metabolic Reprogramming and the Effect of the  
745 Aquaglyceroporin FPS1 in Ethanol-Stressed Yeast Cells. *PLOS ONE* 8:e55439.
- 746 40. Raamsdonk LM, Teusink B, Broadhurst D, Zhang N, Hayes A, Walsh MC, Berden JA, Brindle KM,  
747 Kell DB, Rowland JJ. 2001. A functional genomics strategy that uses metabolome data to reveal  
748 the phenotype of silent mutations. *Nature biotechnology* 19:45-50.
- 749 41. Mo ML, Pálsson BØ, Herrgård MJ. 2009. Connecting extracellular metabolomic measurements to  
750 intracellular flux states in yeast. *BMC Systems Biology* 3:37.
- 751 42. Ding M-Z, Zhou X, Yuan Y-J. 2010. Metabolome profiling reveals adaptive evolution of  
752 *Saccharomyces cerevisiae* during repeated vacuum fermentations. *Metabolomics* 6:42-55.
- 753 43. Kim S, Lee DY, Wohlgemuth G, Park HS, Fiehn O, Kim KH. 2013. Evaluation and optimization of  
754 metabolome sample preparation methods for *Saccharomyces cerevisiae*. *Analytical chemistry*  
755 85:2169-2176.
- 756 44. Alfa Aesar. 2021. A15241 2-Phenylethanol, 98+%. <https://www.alfa.com/en/catalog/A15241/>.  
757 Accessed 6 August.
- 758 45. Alfa Aesar. 2021. A14891 2-(4-Hydroxyphenyl)ethanol, 98%.  
759 <https://www.alfa.com/en/catalog/A14891/>. Accessed 10 August.
- 760 46. Alfa Aesar. 2021. L02555 Tryptophol, 97%. <https://www.alfa.com/en/catalog/L02555/>.  
761 Accessed 8 August.
- 762 47. Nissen P, Arneborg N. 2003. Characterization of early deaths of non-*Saccharomyces* yeasts in  
763 mixed cultures with *Saccharomyces cerevisiae*. *Archives of Microbiology* 180:257-263.
- 764 48. Nissen P, Nielsen D, Arneborg N. 2003. Viable *Saccharomyces cerevisiae* cells at high  
765 concentrations cause early growth arrest of non-*Saccharomyces* yeasts in mixed cultures by a  
766 cell-cell contact-mediated mechanism. *Yeast* 20:331-341.
- 767 49. Aoki SK, Pamma R, Hernday AD, Bickham JE, Braaten BA, Low DA. 2005. Contact-dependent  
768 inhibition of growth in *Escherichia coli*. *Science* 309:1245-1248.
- 769 50. Kaiser D. 2004. Signaling in myxobacteria. *Annu Rev Microbiol* 58:75-98.
- 770 51. Kos B, Šušković J, Vuković S, Šimpraga M, Frece J, Matošić S. 2003. Adhesion and aggregation  
771 ability of probiotic strain *Lactobacillus acidophilus* M92. *Journal of applied microbiology* 94:981-  
772 987.
- 773 52. Lenhart BA, Meeks B, Murphy HA. 2019. Variation in filamentous growth and response to  
774 quorum-sensing compounds in environmental isolates of *Saccharomyces cerevisiae*. *G3: Genes,*  
775 *Genomes, Genetics* 9:1533-1544.
- 776 53. Savorani F, Tomasi G, Engelsen SB. 2010. icoshift: A versatile tool for the rapid alignment of 1D  
777 NMR spectra. *Journal of magnetic resonance* 202:190-202.
- 778 54. De Juan A, Jaumot J, Tauler R. 2014. Multivariate Curve Resolution (MCR). Solving the mixture  
779 analysis problem. *Analytical Methods* 6:4964-4976.

780



781 **TABLES & FIGURES**

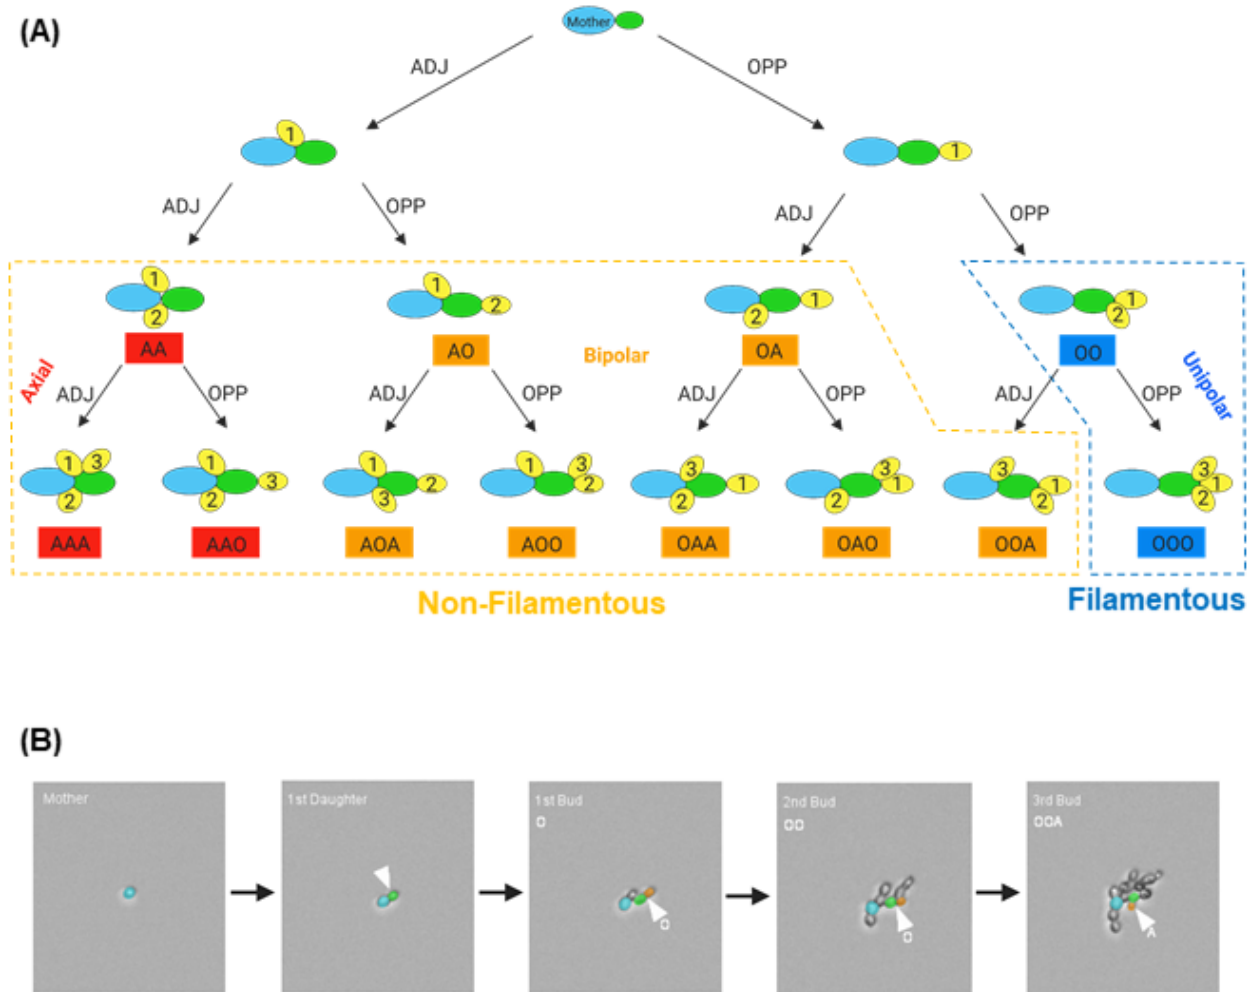

782  
 783 **FIG 1** Bud site sequence categorisation to budding pattern. (A) All potential BSS  
 784 labelled with their corresponding budding pattern (axial = red, bipolar = orange,  
 785 = blue). Bud site sequence is assigned and categorised to a corresponding budding  
 786 pattern for daughters with both two and three bud sites as shown. For cells growing in  
 787 yeast-form, haploids will adopt an axial pattern, defined as new buds emerging  
 788 consistently adjacent to the junction to the mother. Diploids will adopt a bipolar  
 789 whereby buds may emerge either adjacent or opposite the junction to the mother. When  
 790 filamentous growth occurs, both cell types transition to a unipolar budding pattern  
 791 defined as bud sites emerging consistently from the end opposite the junction to the  
 792 mother. In this way, budding pattern can be used as a proxy for tracking filamentous  
 793 growth in liquid media. (B) Example of a cropped image cell being classified by its  
 794 budding pattern. For the 1st daughter (green), the first bud (orange) emerges opposite  
 795 the birth end, followed by a second bud also opposite its birth end and finally the third  
 796 bud emerges adjacent to the birth end. Thus, this daughter would have a bud site  
 797 sequence of OOA which classifies it as bipolar budding pattern according to Fig 1A.

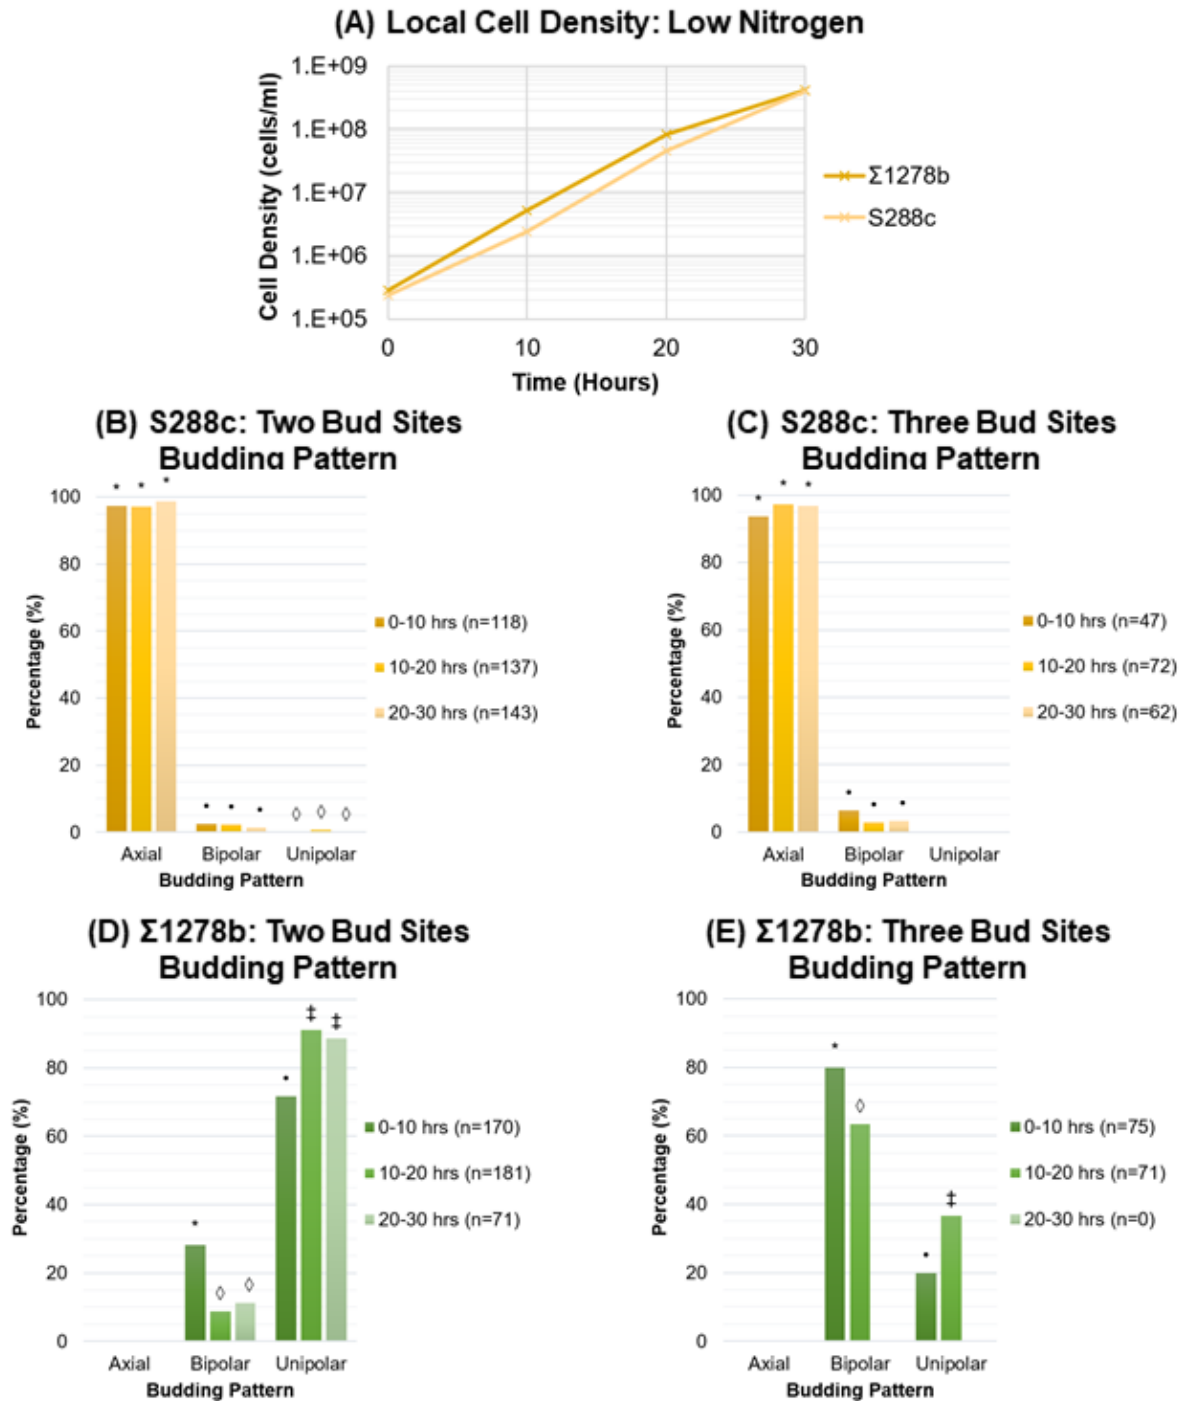

798

799

800

801

802

803

804

**FIG 2** The budding patterns of yeast in low nitrogen liquid media can be tracked during growth and correlated to cell density. (A) Changes in local cell density of S288c and  $\Sigma 1278b$  showed a similar pattern. (C-E) Budding pattern results displayed as a percentage of total cells counted for two bud sites in *S. cerevisiae* strains S288c (B) and  $\Sigma 1278b$  (C) and for three bud sites in strains S288c (D) and  $\Sigma 1278b$  (E). Statistically significant differences at  $p=0.05$  between time points are marked with different symbols.

805 **TABLE 1:** Heatmap of the physiological concentrations of compounds detected in low  
806 nitrogen (SLAD) media during growth of  $\Sigma$ 1278b strain of *S. cerevisiae* over time<sup>a</sup>

| Low Concentration Metabolites ( $\mu$ M) |                 |                  |                  |                 |
|------------------------------------------|-----------------|------------------|------------------|-----------------|
| Metabolite Name                          | 0 hrs           | 10 hrs           | 20 hrs           | 30 hrs          |
| 1-Propanol                               | 0.8 $\pm$ 0.1   | 1.4 $\pm$ 0.3    | 3.7 $\pm$ 0.3    | 6.7 $\pm$ 0.5   |
| 2-Hydroxyisovalerate                     | 0.6 $\pm$ 0.2   | 0.7 $\pm$ 0.2    | 1.3 $\pm$ 0.8    | 2.9 $\pm$ 0.2   |
| 2-Oxoglutarate                           | 3.4 $\pm$ 1.2   | 4.4 $\pm$ 0.2    | 9.3 $\pm$ 2.5    | 61.7 $\pm$ 1.3  |
| 2-Phenylethanol                          | 0.5 $\pm$ 0.1   | 0.7 $\pm$ 0.2    | 1.5 $\pm$ 0.8    | 4.3 $\pm$ 0.4   |
| 3-Methylxanthine                         | 5.9 $\pm$ 0.8   | 3.9 $\pm$ 0.1    | 4.2 $\pm$ 0.4    | 3.7 $\pm$ 0.2   |
| Acetaldehyde                             | 0.4 $\pm$ 0.1   | 2.3 $\pm$ 0.3    | 19.2 $\pm$ 0.6   | 30.0 $\pm$ 3.8  |
| Acetoin                                  | 0.4 $\pm$ 0.1   | 6.7 $\pm$ 4.7    | 8.0 $\pm$ 2.1    | 20.1 $\pm$ 1.3  |
| Choline                                  | 2.3 $\pm$ 0.2   | 2.9 $\pm$ 0.9    | 2.0 $\pm$ 0.8    | 1.6 $\pm$ 0.4   |
| Diacetyl                                 | 5.0 $\pm$ 0.4   | 5.4 $\pm$ 0.4    | 4.8 $\pm$ 0.8    | 5.0 $\pm$ 0.1   |
| Fumarate                                 | 0.6 $\pm$ 0.1   | 0.5 $\pm$ 0.2    | 1.1 $\pm$ 0.5    | 14.6 $\pm$ 1.4  |
| Glycolate                                | 110.7 $\pm$ 3.3 | 112.8 $\pm$ 10.3 | 101.8 $\pm$ 24.3 | 118.1 $\pm$ 2.0 |
| Hydroxyacetone                           | 3.6 $\pm$ 1.6   | 4.2 $\pm$ 1.7    | 2.4 $\pm$ 0.2    | 3.3 $\pm$ 0.1   |
| Isoamylol                                | 0.6 $\pm$ 0.2   | 0.6 $\pm$ 0.4    | 1.0 $\pm$ 0.7    | 11.1 $\pm$ 1.1  |
| Isopropanol                              | 0.3 $\pm$ 0.1   | 0.4 $\pm$ 0.1    | 2.1 $\pm$ 0.2    | 4.8 $\pm$ 0.7   |
| Malate                                   | 2.4 $\pm$ 0.6   | 2.9 $\pm$ 0.4    | 6.8 $\pm$ 3.7    | 10.2 $\pm$ 0.7  |
| Methionine                               | 0.2 $\pm$ 0.1   | 0.2 $\pm$ 0.1    | 0.6 $\pm$ 0.1    | 1.0 $\pm$ 0.1   |
| Myoinositol                              | 47.3 $\pm$ 1.0  | 43.6 $\pm$ 7.3   | 33.1 $\pm$ 13.0  | 41.4 $\pm$ 0.7  |
| Niacin                                   | 9.5 $\pm$ 0.2   | 7.8 $\pm$ 1.6    | 7.6 $\pm$ 2.9    | 9.6 $\pm$ 0.2   |
| Pantothenate                             | 4.3 $\pm$ 0.2   | 4.8 $\pm$ 0.4    | 5.3 $\pm$ 0.6    | 6.0 $\pm$ 0.1   |
| Pyridoxine                               | 7.8 $\pm$ 0.2   | 8.3 $\pm$ 0.3    | 7.8 $\pm$ 0.3    | 7.4 $\pm$ 0.1   |
| Pyruvate                                 | 4.9 $\pm$ 0.9   | 5.0 $\pm$ 0.1    | 30.6 $\pm$ 1.5   | 52.8 $\pm$ 1.9  |
| Succinate                                | 1.8 $\pm$ 0.2   | 2.5 $\pm$ 0.1    | 12.0 $\pm$ 7.3   | 45.0 $\pm$ 0.2  |
| Trehalose                                | 91.3 $\pm$ 0.5  | 88.1 $\pm$ 8.3   | 66.9 $\pm$ 26.6  | 85.9 $\pm$ 1.3  |
| Tyrosol                                  | 0.2 $\pm$ 0.1   | 0.3 $\pm$ 0.1    | 0.8 $\pm$ 0.2    | 4.9 $\pm$ 0.2   |
| Xanthine                                 | 0.9 $\pm$ 0.1   | 1.3 $\pm$ 0.3    | 0.6 $\pm$ 0.1    | 6.6 $\pm$ 0.1   |

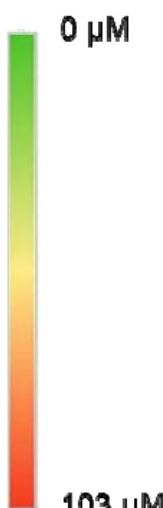

807

| High Concentration Metabolites ( $\mu$ M) |              |             |                |                  |
|-------------------------------------------|--------------|-------------|----------------|------------------|
| Metabolite Name                           | 0 hrs        | 10 hrs      | 20 hrs         | 30 hrs           |
| Acetate                                   | 14 $\pm$ 4   | 17 $\pm$ 1  | 160 $\pm$ 6    | 411 $\pm$ 12     |
| Ethanol                                   | 189 $\pm$ 40 | 369 $\pm$ 8 | 5403 $\pm$ 160 | 14334 $\pm$ 1023 |
| Formate                                   | 221 $\pm$ 2  | 238 $\pm$ 2 | 231 $\pm$ 9    | 193 $\pm$ 4      |
| Glucose ( $\times 10^3$ )                 | 107 $\pm$ 1  | 103 $\pm$ 1 | 115 $\pm$ 5    | 99 $\pm$ 1       |



<sup>a</sup>Metabolites identified through <sup>1</sup>H-NMR and quantified using the SigMa programme (Khakimov et al. 2020). Values are expressed as mean  $\pm$  SE for two or three biological replicates.

VI

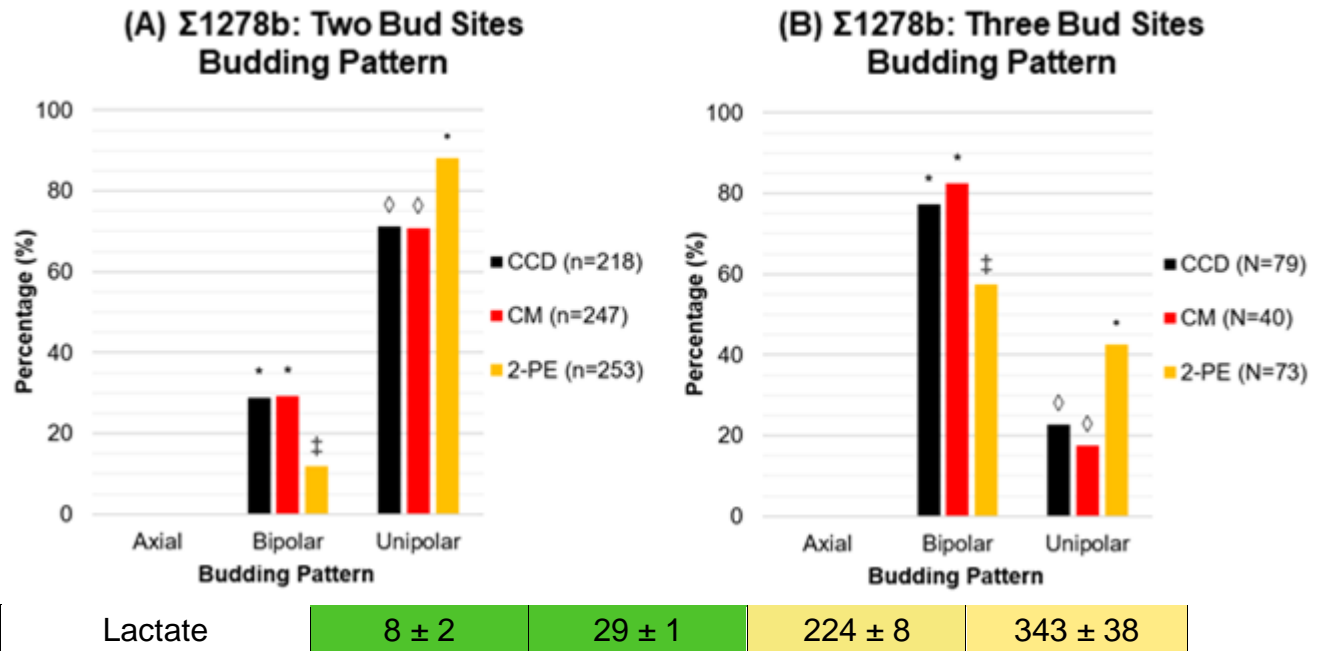

808  
809  
810  
811  
812  
813  
814  
815  
816  
817  
818  
819  
820  
821  
822  
823  
824  
825  
826  
827  
828  
829  
830  
831  
832  
833  
834

**FIG 3** The critical cell density and conditioned media do not induce a shift to unipolar budding under low nitrogen. Experiments carried out using  $\Sigma 1278b$  strain under low nitrogen at the critical cell density to attempt to investigate the effect on cell density alone (CCD), cell density and signalling metabolites in combination (CM), and non-physiological 2-phenylethanol (2PE) on the budding pattern. Budding pattern results for two bud sites (A) and three bud sites (B) show that only 2PE can recapitulate the increase in unipolar budding. Statistically significant differences at  $p=0.05$  between time points are marked with different symbols.

835  
836  
837

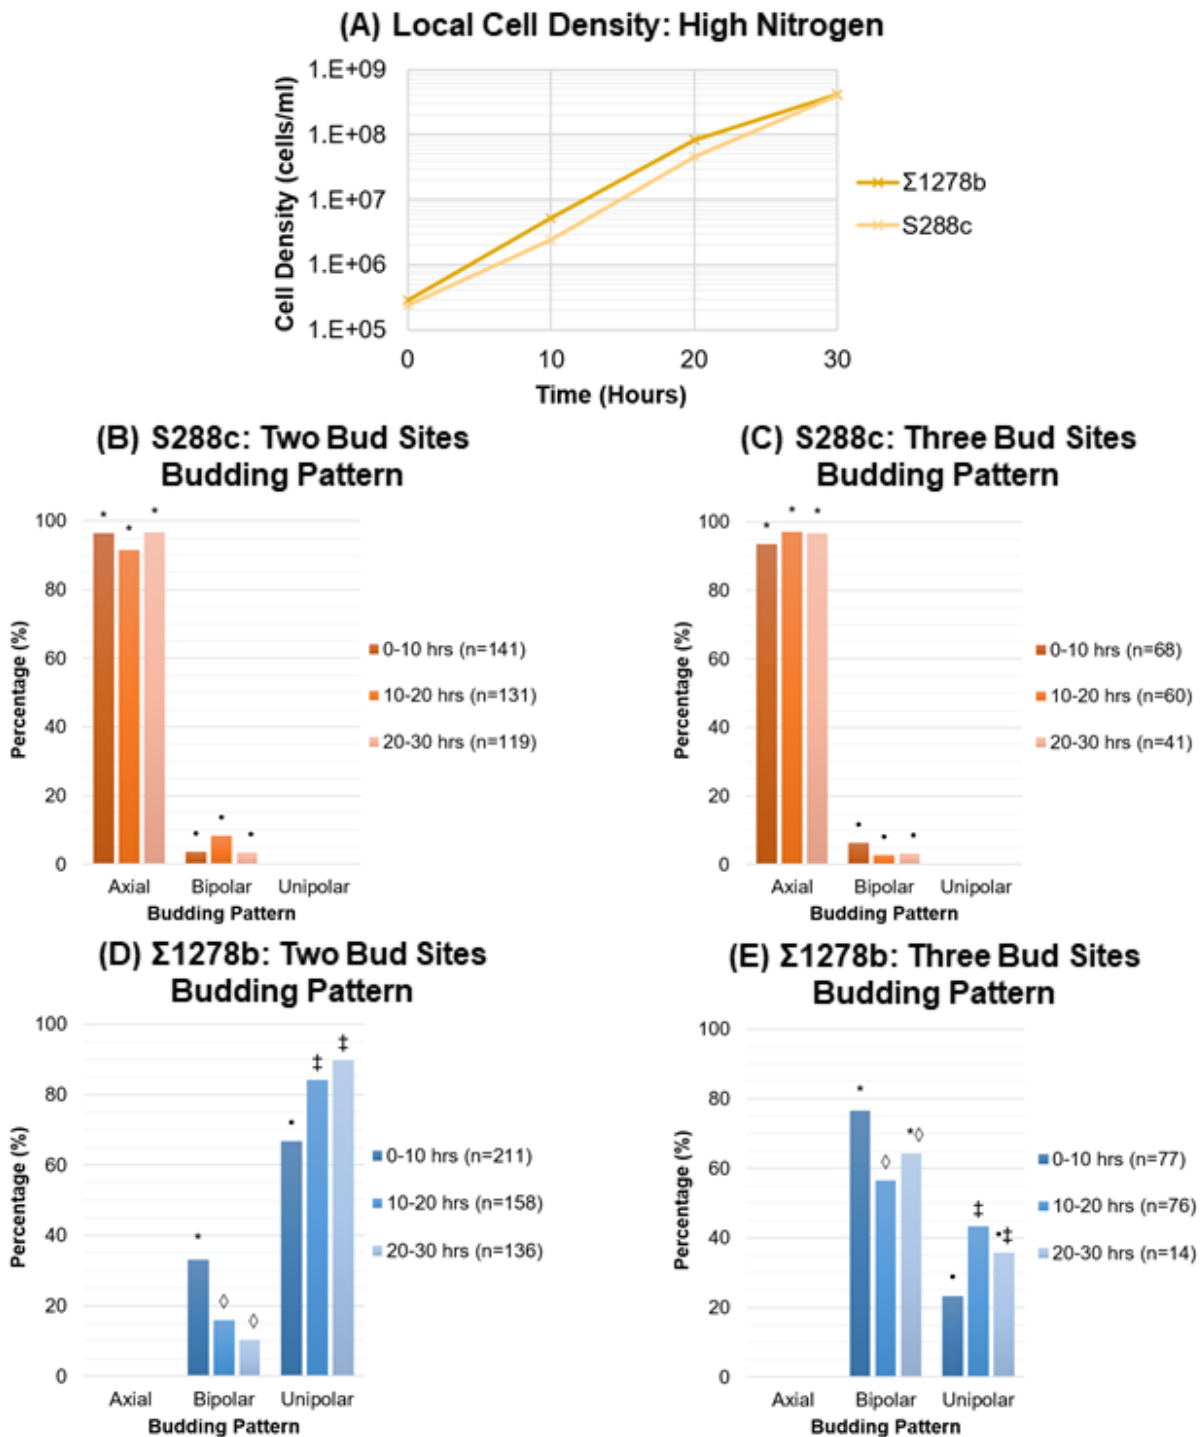

838  
839 **FIG 4** The budding patterns of yeast in high nitrogen liquid media show the same  
840 behaviour compared to low nitrogen. (A) Changes in local cell density of S288c and  
841 Σ1278b showed a similar pattern. (B-E) Budding pattern results displayed as a

842 percentage of total cells counted for two bud sites in *S. cerevisiae* strains S288c (B) and  
 843  $\Sigma$ 1278b (B) and for three bud sites in strains S288c (D) and  $\Sigma$ 1278b (E). Statistically  
 844 significant differences at  $p=0.05$  between time points are marked with different symbols.  
 845 **TABLE 2:** Heatmap of the physiological concentrations of compounds detected in high  
 846 nitrogen (SAD) media during growth of  $\Sigma$ 1278b strain of *S. cerevisiae* over time<sup>a</sup>

| Low Concentration Metabolites ( $\mu$ M) |                 |                 |                 |                 |
|------------------------------------------|-----------------|-----------------|-----------------|-----------------|
| Metabolite Name                          | 0 hrs           | 10 hrs          | 20 hrs          | 30 hrs          |
| 1-Propanol                               | 1.3 $\pm$ 0.1   | 1.4 $\pm$ 0.1   | 3.4 $\pm$ 0.4   | 21.4 $\pm$ 10.5 |
| 2-Hydroxyisovalerate                     | 0.3 $\pm$ 0.1   | 0.4 $\pm$ 0.1   | 0.5 $\pm$ 0.2   | 1.8 $\pm$ 0.3   |
| 2-Oxoglutarate                           | 0.7 $\pm$ 0.2   | 1.5 $\pm$ 0.1   | 2.0 $\pm$ 0.1   | 13.6 $\pm$ 3.2  |
| 2-Phenylethanol                          | 0.4 $\pm$ 0.1   | 0.4 $\pm$ 0.1   | 0.6 $\pm$ 0.1   | 0.9 $\pm$ 0.4   |
| 3-Methylxanthine                         | 6.9 $\pm$ 0.3   | 7.8 $\pm$ 0.1   | 8.3 $\pm$ 0.4   | 6.7 $\pm$ 1.1   |
| Acetaldehyde                             | 1.5 $\pm$ 0.4   | 2.0 $\pm$ 0.6   | 18.0 $\pm$ 5.3  | 18.8 $\pm$ 8.8  |
| Acetoin                                  | 1.2 $\pm$ 0.1   | 1.0 $\pm$ 0.1   | 5.6 $\pm$ 1.9   | 25.3 $\pm$ 15.4 |
| Choline                                  | 2.2 $\pm$ 0.6   | 3.9 $\pm$ 1.0   | 3.7 $\pm$ 1.0   | 2.1 $\pm$ 0.8   |
| Diacetyl                                 | 4.5 $\pm$ 0.1   | 4.5 $\pm$ 0.1   | 4.5 $\pm$ 0.2   | 4.2 $\pm$ 0.1   |
| Fumarate                                 | 0.2 $\pm$ 0.1   | 0.4 $\pm$ 0.1   | 0.3 $\pm$ 0.1   | 4.8 $\pm$ 0.6   |
| Glycolate                                | 102.5 $\pm$ 2.1 | 102.8 $\pm$ 3.3 | 101.9 $\pm$ 2.0 | 85.3 $\pm$ 11.0 |
| Hydroxyacetone                           | 8.1 $\pm$ 0.1   | 7.9 $\pm$ 0.2   | 8.1 $\pm$ 0.3   | 8.4 $\pm$ 0.2   |
| Isoamylol                                | 0.8 $\pm$ 0.1   | 0.7 $\pm$ 0.1   | 0.9 $\pm$ 0.1   | 13.0 $\pm$ 6.6  |
| Isopropanol                              | 0.3 $\pm$ 0.1   | 0.3 $\pm$ 0.1   | 2.9 $\pm$ 0.8   | 2.5 $\pm$ 0.8   |
| Malate                                   | 3.0 $\pm$ 0.3   | 2.1 $\pm$ 0.5   | 2.2 $\pm$ 0.2   | 6.2 $\pm$ 1.1   |
| Methionine                               | 0.2 $\pm$ 0.1   | 0.3 $\pm$ 0.1   | 0.5 $\pm$ 0.1   | 6.8 $\pm$ 3.8   |
| Myoinositol                              | 51.3 $\pm$ 0.9  | 50.3 $\pm$ 0.7  | 48.2 $\pm$ 1.6  | 43.7 $\pm$ 4.2  |
| Niacin                                   | 9.4 $\pm$ 0.3   | 9.4 $\pm$ 0.3   | 11.6 $\pm$ 0.9  | 6.5 $\pm$ 1.7   |
| Pantothenate                             | 4.9 $\pm$ 0.1   | 5.3 $\pm$ 0.3   | 5.3 $\pm$ 0.2   | 5.5 $\pm$ 0.2   |
| Pyridoxine                               | 8.9 $\pm$ 0.2   | 9.0 $\pm$ 0.3   | 9.6 $\pm$ 0.2   | 10.5 $\pm$ 1.1  |
| Pyruvate                                 | 8.5 $\pm$ 0.8   | 11.5 $\pm$ 0.5  | 38.8 $\pm$ 6.3  | 92.2 $\pm$ 48.2 |
| Succinate                                | 1.4 $\pm$ 0.2   | 0.9 $\pm$ 0.1   | 1.6 $\pm$ 0.1   | 18.5 $\pm$ 10.9 |
| Trehalose                                | 95.3 $\pm$ 1.5  | 94.4 $\pm$ 2.3  | 92.0 $\pm$ 1.1  | 64.1 $\pm$ 18.6 |
| Tyrosol                                  | 0.4 $\pm$ 0.1   | 0.6 $\pm$ 0.1   | 0.3 $\pm$ 0.1   | 0.4 $\pm$ 0.1   |
| Xanthine                                 | 1.1 $\pm$ 0.2   | 1.3 $\pm$ 0.1   | 1.2 $\pm$ 0.4   | 0.9 $\pm$ 0.2   |

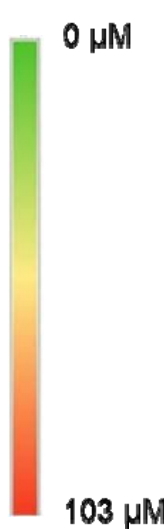

847

| High Concentration Metabolites ( $\mu$ M) |               |              |             |                   |
|-------------------------------------------|---------------|--------------|-------------|-------------------|
| Metabolite Name                           | 0 hrs         | 10 hrs       | 20 hrs      | 30 hrs            |
| Acetate                                   | 32 $\pm$ 5    | 27 $\pm$ 2   | 186 $\pm$ 4 | 639 $\pm$ 62      |
| Ethanol                                   | 633 $\pm$ 265 | 472 $\pm$ 45 | 4972 $\pm$  | 43113 $\pm$ 22177 |

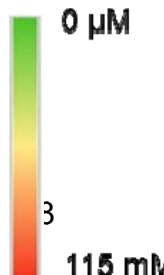

<sup>a</sup>Metabolites identified through <sup>1</sup>H-NMR and quantified using the SiMa programme (Khakimov et

|                             |         |         |          |           |
|-----------------------------|---------|---------|----------|-----------|
| Formate                     | 238 ± 3 | 220 ± 4 | 206 ± 6  | 150 ± 44  |
| Glucose (x10 <sup>3</sup> ) | 114 ± 2 | 112 ± 2 | 110 ± 2  | 102 ± 5   |
| Lactate                     | 24 ± 8  | 33 ± 5  | 231 ± 57 | 848 ± 293 |

848 **TABLE 3** Analysis of whether our budding pattern shift results observed for *S.*  
 849 *cerevisiae* strain  $\Sigma$ 1278b match the criteria for an intercellular signaling molecule and a  
 850 quorum sensing molecule<sup>a</sup>.  
 851

|                                          | <b>Criteria</b>               | <b>2-phenylethanol</b> |
|------------------------------------------|-------------------------------|------------------------|
| <b>Intercellular Signalling Molecule</b> | Extracellular & Identified    | Y                      |
|                                          | Specific signalling mechanism | Y                      |
|                                          | Reproducible response         | N <sup>b</sup>         |
|                                          | Adaptive at community level   | Y                      |
| <b>Quorum Sensing Molecule</b>           | Proportional to cell density  | Y                      |
|                                          | Critical threshold trigger    | N <sup>c</sup>         |

852  
 853 <sup>a</sup> Criteria from (23).

854 <sup>b</sup> Response only observed when 2-phenylethanol used at much higher concentrations  
 855 (20  $\mu$ M) than found to be physiologically produced (0.7 – 1.5  $\mu$ M)

856 <sup>c</sup> Since the response is only induced at high levels it may be a starvation or stress  
 857 response and not a QS mechanism

858  
 859  
 860  
 861  
 862  
 863  
 864  
 865  
 866  
 867  
 868  
 869  
 870  
 871  
 872  
 873  
 874  
 875

876  
877  
878  
879

**(A) Strains of *S. cerevisiae* used in the experiment**

| Strain Name | Source     | Budding Pattern | Filamentation | Reference                     |
|-------------|------------|-----------------|---------------|-------------------------------|
| S288c       | Lab strain | Axial           | -             | ATCC <sup>®</sup> 26108™      |
| Σ1278b      | NCYC 1391  | Bipolar         | +             | (Grenson, Hou & Crabeel 1970) |

**(B) Experimental Set-Up**

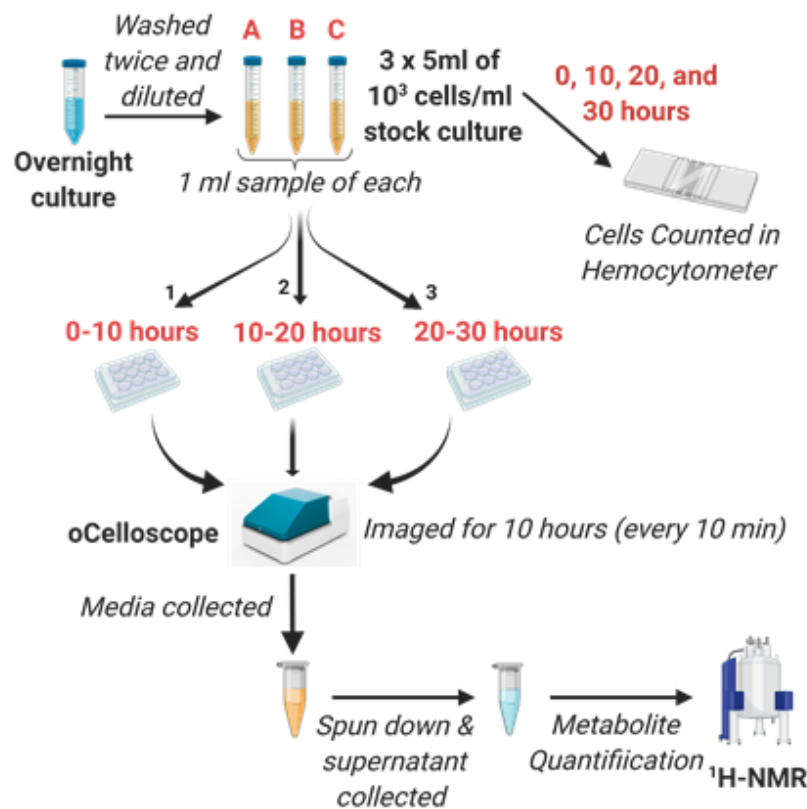

**(C) Conditions**

| Media               | Strain | Starting Cell Density (cells/ml) |
|---------------------|--------|----------------------------------|
| Low Nitrogen (SLAD) | S288c  | 1x10 <sup>3</sup>                |
|                     | Σ1278b |                                  |
| High Nitrogen (SAD) | S288c  |                                  |
|                     | Σ1278b |                                  |

880 **FIG 5** The budding patterns of yeast in low and high nitrogen liquid media can be  
881 tracked during growth and correlated to cell density. (A) Two different strains of *S.*  
882 *cerevisiae* were used to include a positive and negative control for FG. (B) Schematic of



883 the time series that utilised the oCelloScope™ for image acquisition to simultaneously  
 884 monitor budding pattern, cell density, and metabolite concentration using experimental  
 885 conditions in (C) to investigate filamentous growth behaviour under low and high  
 886 nitrogen.

887  
 888

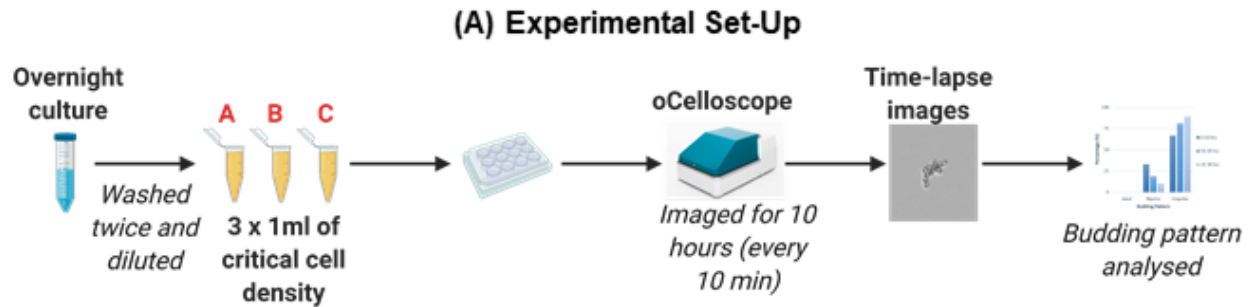

**(B) Experiment conditions for investigating the effects of critical cell density, conditioned media and non-physiological 2-phenylethanol on budding pattern.**

| Label | Description                       | Strains | Media                           | Starting Cell Density (cells/ml) |
|-------|-----------------------------------|---------|---------------------------------|----------------------------------|
| CCD   | Critical Cell Density             |         | SLAD                            |                                  |
| CM    | 20 hours CM                       | Σ1278b  | 20 hours SLAD conditioned media | 2 x 10 <sup>4</sup>              |
| 2-PE  | Non-physiological 2-phenylethanol |         | SLAD + 20 μM 2-phenylethanol    |                                  |

889

890 **FIG 6** Investigating the factors responsible for change in budding pattern. (A) Schematic  
 891 diagram of experimental set-up. (B) Experimental conditions used for experiments  
 892 included the critical cell density (CCD), 20 hours conditioned media (CM), and media  
 893 with a high concentration of 2-phenylethanol (2PE). All conditions inoculated cells at the  
 894 critical cell density 2 x 10<sup>4</sup> cells/ml.

895

896

897

898

899

900 **SUPPLEMENTAL MATERIAL**

901 **MOVIE S1** Example of cropped image and bud site sequence assignment (BSS). For  
 902 the 1st daughter, the first bud emerges opposite the birth end, followed by a second bud  
 903 also opposite its birth end and finally the third bud emerges adjacent to the birth end.  
 904 Thus, this daughter would have a BSS of OOA which classifies it as bipolar budding  
 905 pattern according to Figure 1.

906  
 907 **TABLE S1** Results from Nitrogen Concentration Assay which measured the nitrogen  
 908 concentration from the media and the supernatant from the three biological replicates A,  
 909 B and C end of the BPA experiment.  
 910

| Nitrogen Condition        | High Nitrogen |       |       |       | Low Nitrogen |      |      |      |
|---------------------------|---------------|-------|-------|-------|--------------|------|------|------|
| Condition                 | Media         | A     | B     | C     | Media        | A    | B    | C    |
| <b>Nitrogen Conc (mM)</b> | 82.86         | 79.16 | 78.87 | 81.85 | 1.06         | 0.06 | 0.03 | 0.03 |

911  
 912  
 913  
 914  
 915

**TABLE S2** <sup>1</sup>H-NMR metabolite shifts and intervals with J-coupling. Shifts in bold were used for quantification.

| Label | Metabolite Name      | Shift (ppm) | Multiplicity | J-coupling (hz) | Notes |
|-------|----------------------|-------------|--------------|-----------------|-------|
| 1     | 1-propanol           | 0.88        | t            | 7.5             |       |
|       |                      | <b>1.53</b> | m            | 7.1             |       |
|       |                      | 3.55        | t            | (6.6)           |       |
| 2     | 2-hydroxyisovalerate | 0.83        | d            | 6.86            |       |
|       |                      | <b>0.95</b> | d            | 6.94            |       |
|       |                      | 2.01        | m            | (13.81,6.88)    |       |
|       |                      | 3.84        | d            | (3.75)          |       |
| 3     | 2-oxoglutaric acid   | 2.44        | t            | 6.83            |       |
|       |                      | <b>3.01</b> | t            | 6.82            |       |
| 4     | 2-phenylethanol      | <b>2.85</b> | t            | 6.7             |       |
|       |                      | 3.83        | t            | -               |       |
|       |                      | 7.30        | m            | -               |       |
| 5     | 3-methylxanthine     | 7.37        | t            | 7.5             |       |
|       |                      | 3.51        | s            |                 |       |
| 6     | Acetaldehyde         | <b>8.02</b> | s            |                 |       |
|       |                      | 2.25        | d            | 3.0             |       |
|       |                      | <b>9.68</b> | q            | 3.0             |       |

|           |                   |                                                              |                                        |                                          |                |
|-----------|-------------------|--------------------------------------------------------------|----------------------------------------|------------------------------------------|----------------|
| <b>7</b>  | Acetate           | <b>1.92</b>                                                  | s                                      |                                          |                |
| <b>8</b>  | Acetoin           | 1.38<br><b>2.22</b><br>4.41                                  | d<br>s<br>q                            | 7.1<br>7.1                               |                |
| <b>9</b>  | Arabinose         | 3.51<br>3.68<br>3.83<br>3.90<br>3.95<br>4.05<br>4.50<br>5.25 | dd<br>m<br>dd<br>m<br>m<br>m<br>d<br>d | (9.7,7.8)<br>(9.7, 3.5)<br>7.7<br>(3.57) | NQ             |
| <b>10</b> | Choline           | <b>3.18</b><br>3.50<br>4.05                                  | s<br>dd<br>ddd                         | (5.8,4.1)                                |                |
| <b>11</b> | Diacetyl          | <b>2.31</b>                                                  | s                                      |                                          |                |
| <b>12</b> | Ethanol           | <b>1.18</b><br>3.66                                          | t<br>q                                 | 7.0<br>7.0                               |                |
| <b>13</b> | Formate           | <b>8.45</b>                                                  | s                                      |                                          |                |
| <b>14</b> | Fructose          | 3.58<br>3.69<br>3.82<br>3.90<br>4.00<br>4.03<br>4.12         | m<br>m<br>m<br>dd<br>m<br>dd<br>m      | (9.9,3.4)<br>12.8, 1.0                   | NQ             |
| <b>15</b> | Fumarate          | <b>6.51</b>                                                  | s                                      |                                          |                |
| <b>16</b> | $\alpha$ -glucose | 3.81<br>3.82<br>3.38<br>3.70<br>3.53<br>5.24                 | m<br>m<br>m<br>m<br>m<br>d             | 3.8                                      | Media nutrient |
| <b>17</b> | $\beta$ -glucose  | 3.89<br>3.72<br>3.38<br>3.45<br>3.23<br><b>4.63</b>          | m<br>m<br>m<br>m<br>dd<br>d            | (7.8, 9.2)<br>8.0                        | Media nutrient |
| <b>18</b> | Glycolate         | <b>3.96</b>                                                  | s                                      |                                          |                |
| <b>19</b> | Hydroxyacetone    | <b>2.16</b><br>3.27<br>4.26                                  | s<br>s<br>d                            |                                          |                |

|           |              |                                                                    |                                      |                                          |                |
|-----------|--------------|--------------------------------------------------------------------|--------------------------------------|------------------------------------------|----------------|
| <b>20</b> | Isoamylol    | 0.86<br><b>1.44</b><br>1.66<br>3.5<br>4.3                          | d<br>q<br>m<br>t<br>s                | 6.9<br>7.0                               |                |
| <b>21</b> | Isopropanol  | <b>1.16</b><br>4.01                                                | d<br>m                               | 6.0                                      |                |
| <b>22</b> | Lactic acid  | <b>1.31</b><br>4.10                                                | d<br>q                               | 7.0<br>7.0                               |                |
| <b>23</b> | Malic acid   | 2.34<br><b>2.66</b><br>4.29                                        | dd<br>dd<br>dd                       | (15.37,10.2)<br>15.4, 2.9<br>(10.23,2.9) |                |
| <b>24</b> | Myo-inositol | 3.26<br>3.52<br>3.61<br><b>4.06</b>                                | t<br>dd<br>t<br>t                    | (9.3)<br>9.7<br>2.8                      | Media nutrient |
| <b>25</b> | Niacin       | 7.53<br>8.26<br>8.61<br><b>8.94</b>                                | t<br>d<br>d<br>s                     | (7.94, 4.90)<br>(4.98, 1.67)             | Media nutrient |
| <b>26</b> | Pantothenate | 0.88<br><b>0.92</b><br>2.40<br>3.37<br>3.4<br>3.48<br>3.51<br>3.98 | s<br>s<br>t<br>s<br>m<br>s<br>s<br>s |                                          | Media nutrient |
| <b>27</b> | Pyridoxine   | 2.47<br>4.73<br>7.69                                               | s<br>s<br>s                          |                                          |                |
| <b>28</b> | Pyruvate     | 2.38                                                               | s                                    |                                          |                |
| <b>29</b> | Succinate    | 2.41                                                               | s                                    |                                          |                |
| <b>30</b> | Taurine      | 3.25<br>3.42                                                       | t<br>t                               | 6.1<br>(6.1)                             | NQ             |
| <b>31</b> | Trehalose    | 3.42<br>3.64<br>3.75<br>3.82<br>5.11                               | t<br>dd<br>m<br>m<br>d               | (9.47)<br>(9.93,3.8)<br>3.8              |                |
| <b>32</b> | Tyrosol      | 2.77<br>3.77<br>6.86<br>7.17                                       | t<br>t<br>d<br>d                     | 6.7<br>-<br>8.4<br>8.5                   |                |

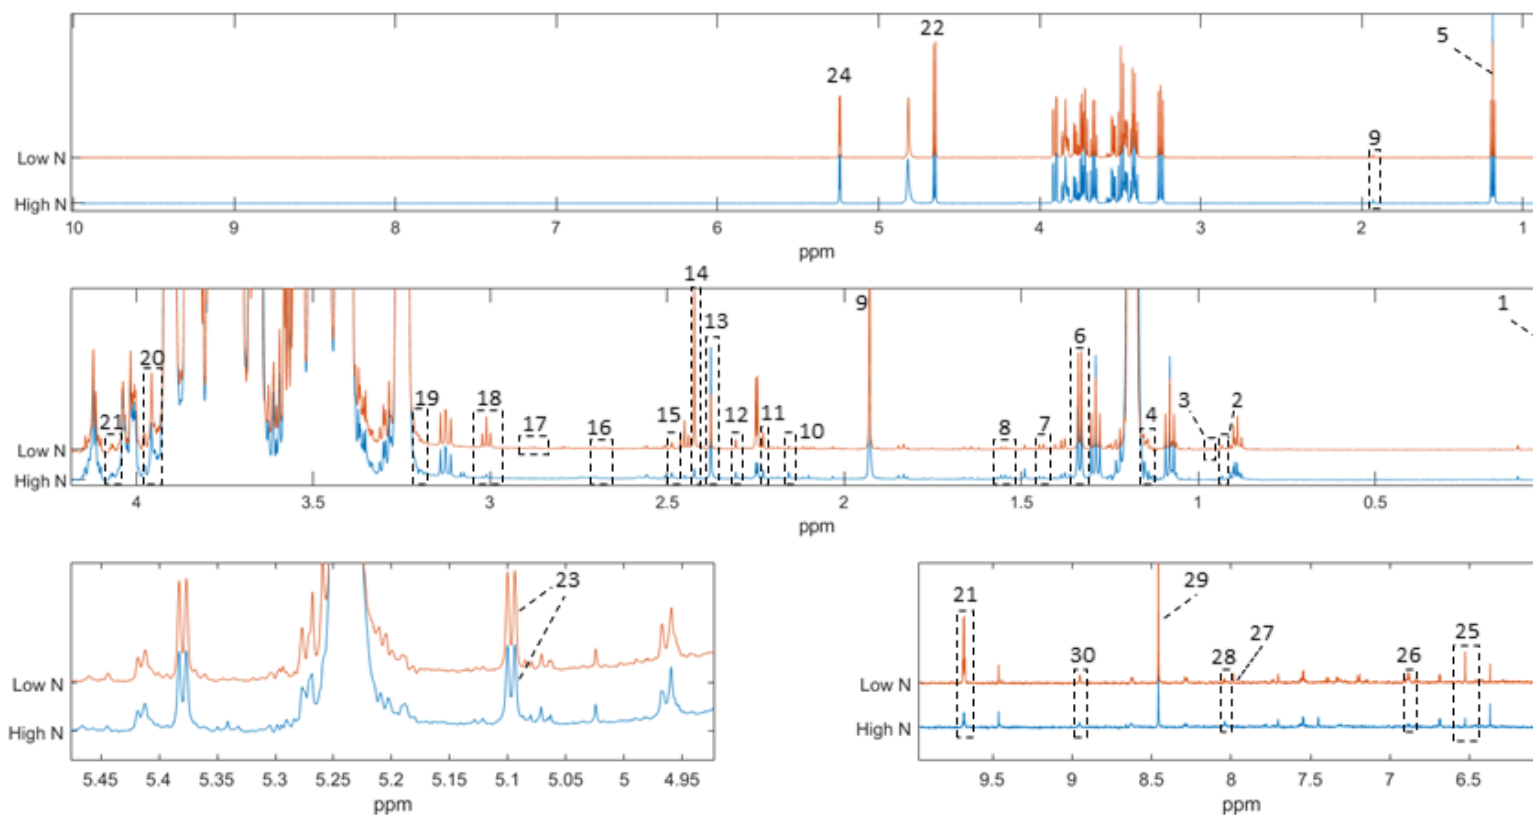

917  
918 **FIG S1** Representative  $^1\text{H}$ -NMR spectra of samples. The major resonances used for  
919 quantification have been assigned: 1. TSP; 2. Pantothenate; 3. 2-hydroxyisovalerate; 4.  
920 Isopropanol; 5. Ethanol; 6. Lactate; 7. Isoamylol; 8. 1-Propanol; 9. Acetate; 10.  
921 Hydroxyacetone; 11. Acetoin; 12. Diacetyl; 13. Pyruvate; 14. Succinate; 15. Pyridoxine;  
922 16. Malate; 17. 2-Phenylethanol; 18. 2-oxoglutarate; 19. Choline; 20. Glycolate; 21.  
923 Myoinositol; 22.  $\beta$ -Glucose; 23. Trehalose; 24.  $\alpha$ -Glucose; 25. Fumarate; 26. Tyrosol;  
924 27. Xanthine; 28. 3-Methylxanthine; 29. Formate; 30. Niacin; 31. Acetaldehyde.

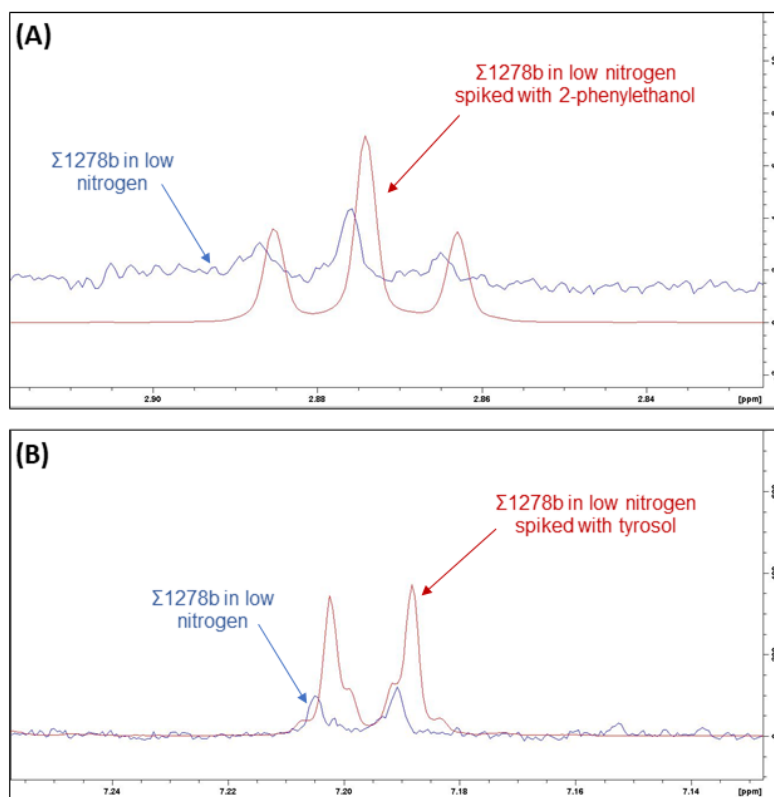

925  
926  
927  
928  
929

**FIG S2** Representative  $^1\text{H}$ -NMR spectra showing the results of the spiking experiment conducted by adding (A) 10  $\mu\text{L}$  2-phenylethanol and (B) 5  $\mu\text{L}$  tyrosol to the samples.
